# Supplementary material for: In Silico Exploration of Microtubule Agent Griseofulvin and Its Derivatives Interactions with Different Human β-Tubulin Isotypes
Source: MDPI journal article supplement (doi:10.3390/molecules28052384), 2023-03-05
Supplement: s1 [file s1]

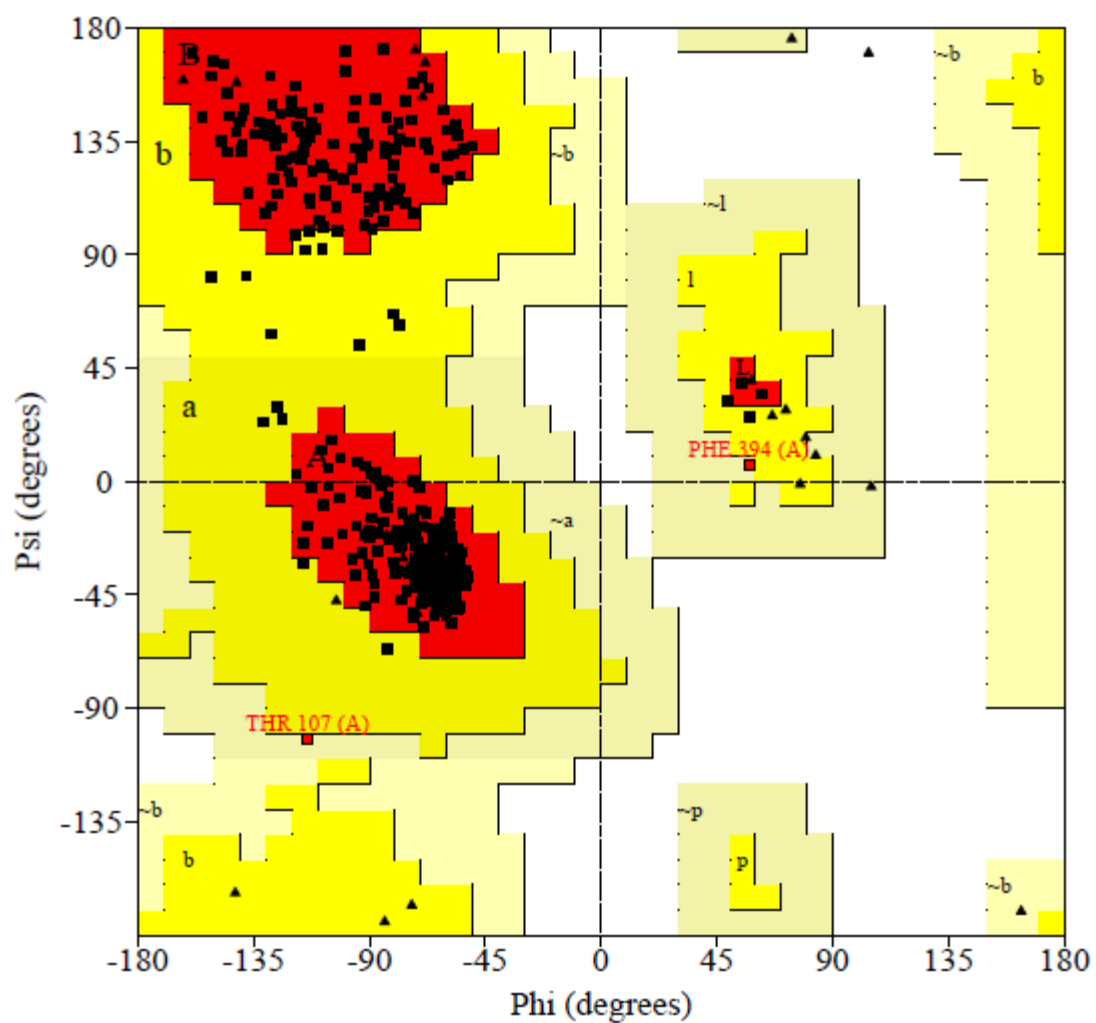

Figure S2. Ramachandran plot analysis of Human  $\beta$ -tubulin (TBB5\_HUMAN) obtained from AlphaFold. Here, red region indicates favored region, yellow region for allowed and light yellow shows generously allowed region and white for disallowed region. Phi and Psi angles determine torsion angles.

Table S3. Ramachandran plot statistics of Human  $\beta$ -tubulin obtained from AlphaFold.

| Plot statistics                                                                  |     |        |
|----------------------------------------------------------------------------------|-----|--------|
| Residues in most favoured regions [A,B,L]                                        | 366 | 94.6%  |
| Residues in additional allowed regions [a,b,l,p]                                 | 19  | 4.9%   |
| Residues in generously allowed regions [ $\sim$ a, $\sim$ b, $\sim$ l, $\sim$ p] | 2   | 0.5%   |
| Residues in disallowed regions                                                   | 0   | 0.0%   |
| <hr/>                                                                            |     |        |
| Number of non-glycine and non-proline residues                                   | 387 | 100.0% |
| Number of end-residues (excl. Gly and Pro)                                       | 2   |        |
| Number of glycine residues (shown as triangles)                                  | 35  |        |
| Number of proline residues                                                       | 20  |        |
| <hr/>                                                                            |     |        |
| Total number of residues                                                         | 444 |        |
