# Supplementary material for: In Silico Exploration of Microtubule Agent Griseofulvin and Its Derivatives Interactions with Different Human β-Tubulin Isotypes
Source: Molecules. 2023 Mar 5;28(5):2384. doi: 10.3390/molecules28052384 (PMC10005519; doi:10.3390/molecules28052384)
Supplement: Supplementary file 1 [file molecules-28-02384-s001.zip]

Archive with 4 entries (4 files):
- Figure S1, Table S2.pdf
- Figure S2, Table S3.pdf
- Table S1.xls
- Table S4.xls
