# Supplementary material for: In Silico Exploration of Microtubule Agent Griseofulvin and Its Derivatives Interactions with Different Human β-Tubulin Isotypes
Source: Molecules. 2023 Mar 5;28(5):2384. doi: 10.3390/molecules28052384 (PMC10005519; doi:10.3390/molecules28052384)
Supplement: Supplementary file 1 [file molecules-28-02384-s001.zip › Table S4.xls]

## Sheet: Table S4
Table S4. Virtual screening by PyRx.
Ligands	Binding Energy (Kcal/mol)	rmsd/ub	rmsd/lb
6q_73331488_uff_E=637.67	-9.3	0	0
6q_73331487_uff_E=640.93	-9.1	0	0
6q_73331205_uff_E=629.44	-9.1	0	0
6q_46844082_uff_E=682.67	-9.1	0	0
6q_25171849_uff_E=574.34	-9.1	0	0
6q_46844082_uff_E=682.67	-9	5.626	0.468
6q_73331488_uff_E=637.67	-8.9	1.501	0.961
6q_73330764_uff_E=710.57	-8.9	0	0
6q_123293391_uff_E=636.92	-8.9	0	0
6q_118263246_uff_E=636.92	-8.9	0	0
6q_73331347_uff_E=651.09	-8.8	0	0
6q_73331060_uff_E=634.29	-8.8	0	0
6q_73330911_uff_E=636.92	-8.8	0	0
6q_73330766_uff_E=651.99	-8.8	0	0
6q_46844082_uff_E=682.67	-8.8	8.832	3.47
6q_46844082_uff_E=682.67	-8.8	7.849	3.483
6q_36314_uff_E=4085.63	-8.8	0	0
6q_25171849_uff_E=574.34	-8.8	7.944	4.238
6q_25171849_uff_E=574.34	-8.8	7.982	5.056
6q_118254083_uff_E=620.90	-8.8	0	0
6q_73331346_uff_E=611.27	-8.7	0	0
6q_73331209_uff_E=661.60	-8.7	0	0
6q_46844082_uff_E=682.67	-8.7	6.773	1.778
6q_123704177_uff_E=624.00	-8.7	0	0
6q_118263247_uff_E=624.00	-8.7	0	0
6q_118254232_uff_E=631.91	-8.7	0	0
6q_73331628_uff_E=624.00	-8.6	0	0
6q_73331487_uff_E=640.93	-8.6	8.548	4.801
6q_73331349_uff_E=627.67	-8.6	0	0
6q_73331345_uff_E=668.75	-8.6	0	0
6q_73330910_uff_E=648.69	-8.6	0	0
6q_46844082_uff_E=682.67	-8.6	8.224	2.948
6q_46844082_uff_E=682.67	-8.6	5.815	2.65
6q_46844082_uff_E=682.67	-8.6	7.732	1.816
6q_46844082_uff_E=682.67	-8.6	7.059	3.007
6q_132286067_uff_E=605.32	-8.6	7.75	2.549
6q_132286067_uff_E=605.32	-8.6	0	0
6q_129895176_uff_E=504.54	-8.6	0	0
6q_125429498_uff_E=568.24	-8.6	0	0
6q_125429178_uff_E=504.54	-8.6	0	0
6q_118254213_uff_E=644.51	-8.6	0	0
6q_73331491_uff_E=631.59	-8.5	0	0
6q_73331487_uff_E=640.93	-8.5	8.625	5.086
6q_73331487_uff_E=640.93	-8.5	8.278	4.732
6q_73331345_uff_E=668.75	-8.5	1.943	1.641
6q_73330912_uff_E=647.29	-8.5	0	0
6q_73330766_uff_E=651.99	-8.5	1.298	1.057
6q_36314_uff_E=4085.63	-8.5	2.626	1.612
6q_25171849_uff_E=574.34	-8.5	5.535	2.085
6q_118254246_uff_E=635.83	-8.5	0	0
6q_118254151_uff_E=635.34	-8.5	6.646	4.365
6q_118254151_uff_E=635.34	-8.5	7.722	4.875
6q_118254151_uff_E=635.34	-8.5	0	0
6q_73331487_uff_E=640.93	-8.4	8.119	4.787
6q_73331344_uff_E=637.78	-8.4	2.701	1.938
6q_73331344_uff_E=637.78	-8.4	0	0
6q_73331209_uff_E=661.60	-8.4	1.267	0.94
6q_73331205_uff_E=629.44	-8.4	7.135	4.316
6q_73331060_uff_E=634.29	-8.4	1.636	1.383
6q_73330762_uff_E=621.15	-8.4	0	0
6q_36314_uff_E=4085.63	-8.4	3.472	0.872
6q_36314_uff_E=4085.63	-8.4	3.83	1.849
6q_25171849_uff_E=574.34	-8.4	7.54	3.534
6q_25171849_uff_E=574.34	-8.4	2.491	1.594
6q_144564153_uff_E=641.96	-8.4	0	0
6q_132286067_uff_E=605.32	-8.4	8.047	2.44
6q_118263244_uff_E=641.96	-8.4	0	0
6q_118254232_uff_E=631.91	-8.4	6.552	4.248
6q_118254182_uff_E=641.96	-8.4	0	0
6q_118254131_uff_E=612.52	-8.4	0	0
6q_73331629_uff_E=624.62	-8.3	0	0
6q_73331490_uff_E=626.42	-8.3	0	0
6q_73331349_uff_E=627.67	-8.3	6.829	3.87
6q_73331348_uff_E=633.58	-8.3	0	0
6q_73331346_uff_E=611.27	-8.3	6.863	3.852
6q_73331345_uff_E=668.75	-8.3	6.436	4.086
6q_73331344_uff_E=637.78	-8.3	6.966	4.53
6q_73330764_uff_E=710.57	-8.3	7.237	4.137
6q_70870984_uff_E=487.13	-8.3	1.569	1.249
6q_70870984_uff_E=487.13	-8.3	0	0
6q_36314_uff_E=4085.63	-8.3	4.52	1.943
6q_25171849_uff_E=574.34	-8.3	7.345	4.637
6q_129895176_uff_E=504.54	-8.3	2.946	2.288
6q_125429840_uff_E=506.48	-8.3	0	0
6q_118254216_uff_E=633.63	-8.3	2.575	1.739
6q_118254216_uff_E=633.63	-8.3	0	0
6q_118254083_uff_E=620.90	-8.3	6.272	3.493
6q_73331772_uff_E=586.44	-8.2	0	0
6q_73331491_uff_E=631.59	-8.2	6.398	3.857
6q_73331488_uff_E=637.67	-8.2	7.901	4.832
6q_73331487_uff_E=640.93	-8.2	5.846	3.139
6q_73331348_uff_E=633.58	-8.2	6.441	3.421
6q_73331209_uff_E=661.60	-8.2	6.846	4.325
6q_70876805_uff_E=498.65	-8.2	0	0
6q_46844079_uff_E=544.43	-8.2	1.329	1.22
6q_46844079_uff_E=544.43	-8.2	0	0
6q_36314_uff_E=4085.63	-8.2	8.289	2.63
6q_36314_uff_E=4085.63	-8.2	3.513	1.699
6q_25171849_uff_E=574.34	-8.2	6.474	2.653
6q_144564153_uff_E=641.96	-8.2	6.101	3.232
6q_132286067_uff_E=605.32	-8.2	3.952	2.43
6q_132286067_uff_E=605.32	-8.2	7.881	2.747
6q_132286067_uff_E=605.32	-8.2	2.465	1.99
6q_125429178_uff_E=504.54	-8.2	3.009	2.319
6q_125429178_uff_E=504.54	-8.2	8.035	2.797
6q_123836216_uff_E=631.96	-8.2	8.267	5.42
6q_123836216_uff_E=631.96	-8.2	0	0
6q_118263244_uff_E=641.96	-8.2	6.122	3.256
6q_118254216_uff_E=633.63	-8.2	7.403	4.154
6q_118254182_uff_E=641.96	-8.2	6.056	3.21
6q_118254151_uff_E=635.34	-8.2	3.362	2.676
6q_118254151_uff_E=635.34	-8.2	2.582	2.178
6q_118254121_uff_E=637.58	-8.2	0	0
6q_118254103_uff_E=631.96	-8.2	8.227	5.402
6q_118254103_uff_E=631.96	-8.2	0	0
6q_73331772_uff_E=586.44	-8.1	8.919	2.375
6q_73331488_uff_E=637.67	-8.1	7.864	5.076
6q_73331487_uff_E=640.93	-8.1	5.575	3.977
6q_73331347_uff_E=651.09	-8.1	7.105	4.311
6q_73331346_uff_E=611.27	-8.1	6.855	3.249
6q_73331345_uff_E=668.75	-8.1	8.068	4.099
6q_73331208_uff_E=661.17	-8.1	0	0
6q_73331060_uff_E=634.29	-8.1	7.934	3.657
6q_73331060_uff_E=634.29	-8.1	8.117	3.658
6q_70870984_uff_E=487.13	-8.1	8.01	5.697
6q_56950846_uff_E=485.31	-8.1	8.536	3.192
6q_56950846_uff_E=485.31	-8.1	0	0
6q_46844079_uff_E=544.43	-8.1	2.944	2.347
6q_36314_uff_E=4085.63	-8.1	5.435	2.124
6q_36314_uff_E=4085.63	-8.1	5.103	1.925
6q_25171849_uff_E=574.34	-8.1	7.876	3.737
6q_13735050_uff_E=749.67	-8.1	0	0
6q_132286397_uff_E=602.85	-8.1	0	0
6q_132286067_uff_E=605.32	-8.1	7.42	3.011
6q_129895176_uff_E=504.54	-8.1	4.328	2.572
6q_129895176_uff_E=504.54	-8.1	8.008	2.777
6q_118254151_uff_E=635.34	-8.1	1.87	1.615
6q_73331772_uff_E=586.44	-8	6.817	3.698
6q_73331349_uff_E=627.67	-8	6.781	3.24
6q_73331209_uff_E=661.60	-8	2.528	1.861
6q_73331205_uff_E=629.44	-8	7.295	4.97
6q_73331060_uff_E=634.29	-8	7.916	3.607
6q_73330766_uff_E=651.99	-8	8.82	2.853
6q_73330766_uff_E=651.99	-8	8.662	2.622
6q_73330764_uff_E=710.57	-8	6.286	3.055
6q_73330764_uff_E=710.57	-8	6.073	3.405
6q_73330763_uff_E=714.76	-8	0	0
6q_44566075_uff_E=523.32	-8	0	0
6q_44139588_uff_E=509.86	-8	0	0
6q_25172057_uff_E=459.89	-8	0	0
6q_13735050_uff_E=749.67	-8	8.56	3.966
6q_132286397_uff_E=602.85	-8	2.473	1.906
6q_132286067_uff_E=605.32	-8	7.864	2.586
6q_129895176_uff_E=504.54	-8	7.604	3.508
6q_125429178_uff_E=504.54	-8	7.568	3.553
6q_125429178_uff_E=504.54	-8	4.319	2.571
6q_123836216_uff_E=631.96	-8	6.071	3.376
6q_118254227_uff_E=641.19	-8	0	0
6q_118254216_uff_E=633.63	-8	7.576	3.992
6q_118254214_uff_E=630.93	-8	0	0
6q_118254179_uff_E=699.45	-8	0	0
6q_118254145_uff_E=558.28	-8	7.238	3.288
6q_118254145_uff_E=558.28	-8	0	0
6q_118254142_uff_E=558.28	-8	7.256	3.294
6q_118254142_uff_E=558.28	-8	0	0
6q_118254121_uff_E=637.58	-8	6.646	3.928
6q_118254121_uff_E=637.58	-8	1.795	1.421
6q_118254103_uff_E=631.96	-8	6.546	3.64
6q_91035900_uff_E=505.87	-7.9	0	0
6q_73331772_uff_E=586.44	-7.9	6.072	3.218
6q_73331772_uff_E=586.44	-7.9	7.895	3.873
6q_73331348_uff_E=633.58	-7.9	5.885	2.851
6q_73331345_uff_E=668.75	-7.9	6.088	3.304
6q_73331344_uff_E=637.78	-7.9	3.895	2.698
6q_73331208_uff_E=661.17	-7.9	2.832	1.987
6q_73331205_uff_E=629.44	-7.9	7.074	2.553
6q_73331060_uff_E=634.29	-7.9	6.571	4.412
6q_73331060_uff_E=634.29	-7.9	8.165	4.383
6q_73330911_uff_E=636.92	-7.9	7.545	2.656
6q_73330910_uff_E=648.69	-7.9	8.006	5.218
6q_73330763_uff_E=714.76	-7.9	8.775	3.043
6q_73330762_uff_E=621.15	-7.9	6.485	2.391
6q_71764911_uff_E=490.07	-7.9	0	0
6q_56950846_uff_E=485.31	-7.9	7.275	4.643
6q_56950845_uff_E=553.08	-7.9	8.072	5.199
6q_56950845_uff_E=553.08	-7.9	0	0
6q_46843963_uff_E=502.61	-7.9	0	0
6q_44139589_uff_E=599.15	-7.9	0	0
6q_147116578_uff_E=520.21	-7.9	0	0
6q_144564145_uff_E=652.83	-7.9	0	0
6q_132286067_uff_E=605.32	-7.9	3.048	2.252
6q_129895481_uff_E=567.88	-7.9	0	0
6q_125429840_uff_E=506.48	-7.9	8.327	4.01
6q_125429497_uff_E=567.88	-7.9	0	0
6q_125429178_uff_E=504.54	-7.9	7.7	3.618
6q_125429126_uff_E=510.78	-7.9	0	0
6q_123293391_uff_E=636.92	-7.9	7.485	2.681
6q_118263246_uff_E=636.92	-7.9	7.536	2.666
6q_118254246_uff_E=635.83	-7.9	7.479	2.4
6q_118254232_uff_E=631.91	-7.9	8.289	4.383
6q_75218864_uff_E=499.12	-7.8	0	0
6q_74426566_uff_E=467.72	-7.8	0	0
6q_73331772_uff_E=586.44	-7.8	8.406	4.176
6q_73331772_uff_E=586.44	-7.8	7.264	3.176
6q_73331629_uff_E=624.62	-7.8	6.897	3.163
6q_73331487_uff_E=640.93	-7.8	8.437	5.57
6q_73331349_uff_E=627.67	-7.8	1.481	1.377
6q_73331346_uff_E=611.27	-7.8	7.366	4.901
6q_73330912_uff_E=647.29	-7.8	7.474	2.456
6q_73330625_uff_E=631.30	-7.8	0	0
6q_71764911_uff_E=490.07	-7.8	2.429	2.069
6q_71763717_uff_E=465.30	-7.8	0	0
6q_70876805_uff_E=498.65	-7.8	8.216	5.214
6q_56950845_uff_E=553.08	-7.8	8.638	3.058
6q_56950845_uff_E=553.08	-7.8	8.696	2.719
6q_56950845_uff_E=553.08	-7.8	5.593	3.79
6q_46844083_uff_E=525.07	-7.8	0	0
6q_46844079_uff_E=544.43	-7.8	8.104	4.412
6q_46844022_uff_E=503.08	-7.8	0	0
6q_46843963_uff_E=502.61	-7.8	8.245	5.816
6q_44566075_uff_E=523.32	-7.8	5.001	2.553
6q_44139589_uff_E=599.15	-7.8	5.546	3.404
6q_44139588_uff_E=509.86	-7.8	7.473	5.097
6q_137641183_uff_E=530.84	-7.8	0	0
6q_137467381_uff_E=489.66	-7.8	0	0
6q_13735050_uff_E=749.67	-7.8	1.725	1.372
6q_132286359_uff_E=505.08	-7.8	0	0
6q_129895176_uff_E=504.54	-7.8	2.117	1.616
6q_129895176_uff_E=504.54	-7.8	7.64	3.633
6q_125429498_uff_E=568.24	-7.8	5.565	2.786
6q_125429498_uff_E=568.24	-7.8	7.657	2.774
6q_125429178_uff_E=504.54	-7.8	7.575	4.23
6q_125428702_uff_E=552.27	-7.8	2.121	1.682
6q_125428702_uff_E=552.27	-7.8	8.146	3.481
6q_125428702_uff_E=552.27	-7.8	0	0
6q_123836216_uff_E=631.96	-7.8	6.89	3.052
6q_118263241_uff_E=578.46	-7.8	0	0
6q_118254227_uff_E=641.19	-7.8	6.88	2.372
6q_118254216_uff_E=633.63	-7.8	2.188	1.792
6q_118254214_uff_E=630.93	-7.8	4.926	3.327
6q_118254142_uff_E=558.28	-7.8	6.198	3.915
6q_118254103_uff_E=631.96	-7.8	7.724	4.385
6q_91035900_uff_E=505.87	-7.7	1.519	1.286
6q_75218824_uff_E=483.43	-7.7	6.371	3.613
6q_75218824_uff_E=483.43	-7.7	6.623	3.588
6q_75218824_uff_E=483.43	-7.7	0	0
6q_73331628_uff_E=624.00	-7.7	6.096	3.311
6q_73331490_uff_E=626.42	-7.7	7.277	4.841
6q_73331487_uff_E=640.93	-7.7	5.272	4.294
6q_73331209_uff_E=661.60	-7.7	3.97	2.775
6q_73331208_uff_E=661.17	-7.7	7.767	4.386
6q_73331208_uff_E=661.17	-7.7	3.703	2.683
6q_73330766_uff_E=651.99	-7.7	8.461	3.216
6q_71763717_uff_E=465.30	-7.7	2.555	2.067
6q_70876805_uff_E=498.65	-7.7	9.452	6.218
6q_70870984_uff_E=487.13	-7.7	7.739	5.235
6q_70870984_uff_E=487.13	-7.7	7.506	5.043
6q_56950846_uff_E=485.31	-7.7	7.905	4.429
6q_56950846_uff_E=485.31	-7.7	8.497	2.429
6q_56924747_uff_E=515.53	-7.7	0	0
6q_46844083_uff_E=525.07	-7.7	7.986	5.671
6q_46844079_uff_E=544.43	-7.7	7.007	4.498
6q_46844022_uff_E=503.08	-7.7	8.086	5.375
6q_46843963_uff_E=502.61	-7.7	1.548	1.118
6q_44139589_uff_E=599.15	-7.7	8.345	4.756
6q_137641183_uff_E=530.84	-7.7	8.023	4.159
6q_137467381_uff_E=489.66	-7.7	5.254	2.834
6q_132286397_uff_E=602.85	-7.7	8.963	3.398
6q_132286359_uff_E=505.08	-7.7	7.467	2.876
6q_131975184_uff_E=547.56	-7.7	0	0
6q_129895618_uff_E=499.93	-7.7	0	0
6q_129895481_uff_E=567.88	-7.7	8.099	3.693
6q_129895481_uff_E=567.88	-7.7	3.991	1.118
6q_129895222_uff_E=505.08	-7.7	0	0
6q_125429841_uff_E=499.93	-7.7	0	0
6q_125429498_uff_E=568.24	-7.7	7.129	2.735
6q_125429497_uff_E=567.88	-7.7	8.072	3.722
6q_125427757_uff_E=524.66	-7.7	0	0
6q_123704177_uff_E=624.00	-7.7	6.103	3.323
6q_123214764_uff_E=687.85	-7.7	0	0
6q_118263272_uff_E=1079.99	-7.7	0	0
6q_118263247_uff_E=624.00	-7.7	6.115	3.339
6q_118263246_uff_E=636.92	-7.7	6.575	3.15
6q_118263246_uff_E=636.92	-7.7	4.999	2.259
6q_118263233_uff_E=562.91	-7.7	0	0
6q_118254214_uff_E=630.93	-7.7	8.918	5.497
6q_118254179_uff_E=699.45	-7.7	6.677	3.092
6q_118254151_uff_E=635.34	-7.7	9.054	3.955
6q_118254145_uff_E=558.28	-7.7	8.19	5.608
6q_118254121_uff_E=637.58	-7.7	6.837	3.532
6q_118254083_uff_E=620.90	-7.7	6.439	3.291
6q_118218025_uff_E=467.72	-7.7	0	0
6q_95988134_uff_E=482.23	-7.6	0	0
6q_74426566_uff_E=467.72	-7.6	6.475	2.941
6q_73331632_uff_E=609.71	-7.6	0	0
6q_73331491_uff_E=631.59	-7.6	8.027	4.001
6q_73331490_uff_E=626.42	-7.6	6.537	2.541
6q_73331349_uff_E=627.67	-7.6	7.31	5.001
6q_73331347_uff_E=651.09	-7.6	6.483	2.714
6q_73331344_uff_E=637.78	-7.6	8.102	4.527
6q_73331060_uff_E=634.29	-7.6	8.334	5.09
6q_73330911_uff_E=636.92	-7.6	6.551	3.598
6q_73330910_uff_E=648.69	-7.6	7.978	3.818
6q_73330625_uff_E=631.30	-7.6	8.87	5.304
6q_71764911_uff_E=490.07	-7.6	8.572	5.309
6q_71318420_uff_E=519.02	-7.6	0	0
6q_70876805_uff_E=498.65	-7.6	2.307	1.881
6q_620374_uff_E=372.95	-7.6	0	0
6q_574586_uff_E=496.46	-7.6	0	0
6q_56950846_uff_E=485.31	-7.6	4.14	2.925
6q_56950845_uff_E=553.08	-7.6	8.591	2.621
6q_56950845_uff_E=553.08	-7.6	8.642	2.759
6q_56924747_uff_E=515.53	-7.6	7.462	3.66
6q_56691266_uff_E=482.23	-7.6	0	0
6q_46844083_uff_E=525.07	-7.6	6.924	4.679
6q_46844083_uff_E=525.07	-7.6	8.408	3.435
6q_46844083_uff_E=525.07	-7.6	2.151	1.668
6q_46844079_uff_E=544.43	-7.6	8.394	5.72
6q_46844022_uff_E=503.08	-7.6	7.752	5.273
6q_46843963_uff_E=502.61	-7.6	5.615	2.283
6q_44139589_uff_E=599.15	-7.6	7.365	2.475
6q_44139588_uff_E=509.86	-7.6	7.471	3.559
6q_44139586_uff_E=530.12	-7.6	0	0
6q_137652147_uff_E=534.82	-7.6	0	0
6q_137467381_uff_E=489.66	-7.6	7.26	2.4
6q_132286359_uff_E=505.08	-7.6	5.215	3.045
6q_132286359_uff_E=505.08	-7.6	8.158	2.423
6q_132286359_uff_E=505.08	-7.6	3.94	1.896
6q_132285949_uff_E=530.49	-7.6	0	0
6q_129895481_uff_E=567.88	-7.6	8.584	2.671
6q_129895451_uff_E=502.94	-7.6	0	0
6q_129895222_uff_E=505.08	-7.6	5.154	3.014
6q_129895222_uff_E=505.08	-7.6	8.145	2.368
6q_129895222_uff_E=505.08	-7.6	3.923	1.867
6q_129895222_uff_E=505.08	-7.6	7.471	2.827
6q_129895176_uff_E=504.54	-7.6	8.554	2.538
6q_129895176_uff_E=504.54	-7.6	3.355	1.317
6q_127053184_uff_E=568.68	-7.6	6.925	3.948
6q_127053184_uff_E=568.68	-7.6	6.415	3.571
6q_127053184_uff_E=568.68	-7.6	0	0
6q_125429840_uff_E=506.48	-7.6	3.499	2.345
6q_125429840_uff_E=506.48	-7.6	7.445	4.023
6q_125429634_uff_E=502.94	-7.6	0	0
6q_125429633_uff_E=507.88	-7.6	0	0
6q_125429497_uff_E=567.88	-7.6	4.018	1.158
6q_125429427_uff_E=542.77	-7.6	0	0
6q_125429178_uff_E=504.54	-7.6	2.276	1.786
6q_125429126_uff_E=510.78	-7.6	8.296	2.41
6q_125428702_uff_E=552.27	-7.6	5.997	3.131
6q_123836216_uff_E=631.96	-7.6	7.875	4.601
6q_118263269_uff_E=1102.50	-7.6	0	0
6q_118254214_uff_E=630.93	-7.6	3.299	2.168
6q_118254213_uff_E=644.51	-7.6	7.515	2.873
6q_118254213_uff_E=644.51	-7.6	4.879	2.136
6q_118254151_uff_E=635.34	-7.6	10.026	7.275
6q_118254142_uff_E=558.28	-7.6	8.436	5.843
6q_118254103_uff_E=631.96	-7.6	6.96	2.815
6q_118254083_uff_E=620.90	-7.6	8.011	3.556
6q_118218025_uff_E=467.72	-7.6	6.486	2.958
6q_75218824_uff_E=483.43	-7.5	5.706	2.527
6q_75218824_uff_E=483.43	-7.5	6.51	3.438
6q_73331347_uff_E=651.09	-7.5	1.632	1.45
6q_73331347_uff_E=651.09	-7.5	7.679	5.18
6q_73331208_uff_E=661.17	-7.5	8.868	5.809
6q_73331208_uff_E=661.17	-7.5	7.887	4.743
6q_73331205_uff_E=629.44	-7.5	5.531	3.854
6q_73330911_uff_E=636.92	-7.5	4.982	2.214
6q_73330764_uff_E=710.57	-7.5	7.061	2.296
6q_73330764_uff_E=710.57	-7.5	7.367	3.638
6q_73330764_uff_E=710.57	-7.5	4.87	2.471
6q_73330763_uff_E=714.76	-7.5	7.516	4.137
6q_73330625_uff_E=631.30	-7.5	3.584	2.207
6q_73330625_uff_E=631.30	-7.5	4.584	2.927
6q_70876805_uff_E=498.65	-7.5	7.653	4.093
6q_70876805_uff_E=498.65	-7.5	7.664	5.241
6q_70870984_uff_E=487.13	-7.5	6.122	3.605
6q_70870984_uff_E=487.13	-7.5	6.76	4.239
6q_70870984_uff_E=487.13	-7.5	5.724	2.256
6q_56950846_uff_E=485.31	-7.5	8.257	2.803
6q_56950846_uff_E=485.31	-7.5	8.577	2.456
6q_56950842_uff_E=522.07	-7.5	8.579	6.017
6q_56950842_uff_E=522.07	-7.5	0	0
6q_56924747_uff_E=515.53	-7.5	7.973	3.763
6q_46844083_uff_E=525.07	-7.5	4.645	3.344
6q_46844083_uff_E=525.07	-7.5	8.332	3.965
6q_46844022_uff_E=503.08	-7.5	2.096	1.767
6q_46844022_uff_E=503.08	-7.5	8.285	5.475
6q_46844022_uff_E=503.08	-7.5	4.937	2.602
6q_46843963_uff_E=502.61	-7.5	2.121	1.877
6q_44139590_uff_E=680.31	-7.5	7.83	2.523
6q_44139590_uff_E=680.31	-7.5	0	0
6q_44139588_uff_E=509.86	-7.5	2.685	2.148
6q_44139588_uff_E=509.86	-7.5	8.2	4.601
6q_44139587_uff_E=1748.94	-7.5	0	0
6q_44139586_uff_E=530.12	-7.5	5.339	2.098
6q_147116578_uff_E=520.21	-7.5	5.168	2.692
6q_144564153_uff_E=641.96	-7.5	7.686	3.306
6q_137652147_uff_E=534.82	-7.5	1.924	1.616
6q_137652147_uff_E=534.82	-7.5	7.749	5.211
6q_137641183_uff_E=530.84	-7.5	5.839	2.344
6q_132286457_uff_E=528.62	-7.5	0	0
6q_132286397_uff_E=602.85	-7.5	7.794	2.607
6q_132286165_uff_E=526.02	-7.5	0	0
6q_132285940_uff_E=519.13	-7.5	7.771	3.787
6q_132285940_uff_E=519.13	-7.5	0	0
6q_131975184_uff_E=547.56	-7.5	8.002	3.372
6q_131975182_uff_E=561.17	-7.5	5.889	3.555
6q_131975182_uff_E=561.17	-7.5	0	0
6q_131964492_uff_E=498.10	-7.5	0	0
6q_129895618_uff_E=499.93	-7.5	3.662	2.475
6q_129895618_uff_E=499.93	-7.5	7.614	3.765
6q_129895205_uff_E=525.50	-7.5	0	0
6q_129895087_uff_E=526.27	-7.5	0	0
6q_129894893_uff_E=493.62	-7.5	0	0
6q_129894712_uff_E=519.13	-7.5	7.779	3.829
6q_129894712_uff_E=519.13	-7.5	0	0
6q_125429841_uff_E=499.93	-7.5	3.675	2.5
6q_125429841_uff_E=499.93	-7.5	7.618	3.759
6q_125429840_uff_E=506.48	-7.5	4.454	2.641
6q_125429840_uff_E=506.48	-7.5	4.679	3.154
6q_125429634_uff_E=502.94	-7.5	8.468	2.346
6q_125429633_uff_E=507.88	-7.5	8.105	2.698
6q_125429427_uff_E=542.77	-7.5	2.694	1.928
6q_125429426_uff_E=525.50	-7.5	0	0
6q_125429178_uff_E=504.54	-7.5	4.592	3.033
6q_125429177_uff_E=507.62	-7.5	0	0
6q_125429127_uff_E=505.08	-7.5	8.421	2.828
6q_125429127_uff_E=505.08	-7.5	0	0
6q_125428749_uff_E=493.62	-7.5	0	0
6q_125428703_uff_E=526.27	-7.5	0	0
6q_125427758_uff_E=519.13	-7.5	7.75	3.861
6q_125427758_uff_E=519.13	-7.5	0	0
6q_123293391_uff_E=636.92	-7.5	6.191	2.716
6q_118263246_uff_E=636.92	-7.5	6.174	2.728
6q_118263244_uff_E=641.96	-7.5	7.694	3.334
6q_118263241_uff_E=578.46	-7.5	3.015	2.318
6q_118254214_uff_E=630.93	-7.5	7.651	5.725
6q_118254182_uff_E=641.96	-7.5	7.613	3.334
6q_118254145_uff_E=558.28	-7.5	7.326	1.98
6q_118254142_uff_E=558.28	-7.5	7.324	1.982
6q_118254083_uff_E=620.90	-7.5	7.719	3.48
6q_118218025_uff_E=467.72	-7.5	6.464	3.388
6q_10621755_uff_E=626.37	-7.5	0	0
6q_95988135_uff_E=481.81	-7.4	0	0
6q_75218864_uff_E=499.12	-7.4	5.449	2.808
6q_73331772_uff_E=586.44	-7.4	8.287	2.796
6q_73331491_uff_E=631.59	-7.4	7.767	3.7
6q_73331491_uff_E=631.59	-7.4	7.84	3.534
6q_73331349_uff_E=627.67	-7.4	7.52	4.362
6q_73331349_uff_E=627.67	-7.4	7.924	4.327
6q_73331346_uff_E=611.27	-7.4	6.314	3.756
6q_73331346_uff_E=611.27	-7.4	8.203	5.292
6q_73331208_uff_E=661.17	-7.4	6.313	4.169
6q_73331208_uff_E=661.17	-7.4	4.83	3.341
6q_73331208_uff_E=661.17	-7.4	7.69	5.315
6q_73331205_uff_E=629.44	-7.4	8.027	4.868
6q_73330911_uff_E=636.92	-7.4	6.189	2.725
6q_73330766_uff_E=651.99	-7.4	5.45	2.403
6q_73330764_uff_E=710.57	-7.4	7.251	3.575
6q_73330764_uff_E=710.57	-7.4	5.851	3.154
6q_73330763_uff_E=714.76	-7.4	5.147	3.544
6q_73330762_uff_E=621.15	-7.4	8.262	4.876
6q_73330625_uff_E=631.30	-7.4	4.623	3.049
6q_72726987_uff_E=607.92	-7.4	0	0
6q_71764911_uff_E=490.07	-7.4	5.285	3.483
6q_71763717_uff_E=465.30	-7.4	8.631	5.65
6q_71763717_uff_E=465.30	-7.4	8.347	4.613
6q_71318422_uff_E=595.64	-7.4	0	0
6q_70876805_uff_E=498.65	-7.4	6.158	3.582
6q_70876805_uff_E=498.65	-7.4	5.725	2.126
6q_57393956_uff_E=482.31	-7.4	0	0
6q_56924747_uff_E=515.53	-7.4	5.56	2.021
6q_56924747_uff_E=515.53	-7.4	6.363	3.187
6q_46844079_uff_E=544.43	-7.4	5.48	3.931
6q_44566031_uff_E=562.36	-7.4	0	0
6q_44139589_uff_E=599.15	-7.4	7.749	5.455
6q_44139586_uff_E=530.12	-7.4	5.242	1.929
6q_25172057_uff_E=459.89	-7.4	6.215	3.777
6q_25171635_uff_E=456.32	-7.4	0	0
6q_144564153_uff_E=641.96	-7.4	6.494	3.234
6q_144564145_uff_E=652.83	-7.4	8.143	5.624
6q_137641183_uff_E=530.84	-7.4	4.886	2.278
6q_13735050_uff_E=749.67	-7.4	3.24	2.056
6q_13735050_uff_E=749.67	-7.4	5.964	2.117
6q_132286496_uff_E=560.09	-7.4	4.652	2.701
6q_132286496_uff_E=560.09	-7.4	0	0
6q_132286397_uff_E=602.85	-7.4	7.733	4.088
6q_132286359_uff_E=505.08	-7.4	6.339	3.46
6q_132285940_uff_E=519.13	-7.4	7.538	2.795
6q_131964492_uff_E=498.10	-7.4	6.458	3.748
6q_129895618_uff_E=499.93	-7.4	4.929	3.045
6q_129895618_uff_E=499.93	-7.4	3.469	2.569
6q_129895451_uff_E=502.94	-7.4	7.678	2.272
6q_129895451_uff_E=502.94	-7.4	8.487	2.337
6q_129894712_uff_E=519.13	-7.4	7.529	2.852
6q_125429841_uff_E=499.93	-7.4	3.283	2.433
6q_125429840_uff_E=506.48	-7.4	3.732	2.753
6q_125429634_uff_E=502.94	-7.4	2.025	1.448
6q_125429634_uff_E=502.94	-7.4	7.704	2.246
6q_125429498_uff_E=568.24	-7.4	8.626	4.787
6q_125429426_uff_E=525.50	-7.4	8.287	3.936
6q_125429420_uff_E=541.67	-7.4	0	0
6q_125429177_uff_E=507.62	-7.4	8.174	2.663
6q_125429127_uff_E=505.08	-7.4	5.34	2.83
6q_125429127_uff_E=505.08	-7.4	8.196	2.454
6q_125428702_uff_E=552.27	-7.4	6.26	3.901
6q_123293391_uff_E=636.92	-7.4	6.643	3.437
6q_118267073_uff_E=557.12	-7.4	0	0
6q_118263269_uff_E=1102.50	-7.4	7.248	2.223
6q_118263244_uff_E=641.96	-7.4	6.471	3.219
6q_118254219_uff_E=599.83	-7.4	0	0
6q_118254214_uff_E=630.93	-7.4	4.654	3.089
6q_118254213_uff_E=644.51	-7.4	6.027	3.096
6q_118254145_uff_E=558.28	-7.4	7.189	2.293
6q_118254145_uff_E=558.28	-7.4	5.256	2.923
6q_118254142_uff_E=558.28	-7.4	7.194	2.307
6q_118254142_uff_E=558.28	-7.4	5.22	2.896
6q_118254103_uff_E=631.96	-7.4	6.205	3.423
6q_118218025_uff_E=467.72	-7.4	5.492	3.328
6q_98058924_uff_E=293.41	-7.3	0	0
6q_91564943_uff_E=503.49	-7.3	0	0
6q_75218824_uff_E=483.43	-7.3	2.291	1.973
6q_75218801_uff_E=494.49	-7.3	0	0
6q_74426566_uff_E=467.72	-7.3	2.599	2.084
6q_73331491_uff_E=631.59	-7.3	2.398	1.946
6q_73331488_uff_E=637.67	-7.3	7.416	5.146
6q_73331349_uff_E=627.67	-7.3	6.341	3.797
6q_73331345_uff_E=668.75	-7.3	7.341	3.35
6q_73331344_uff_E=637.78	-7.3	10.732	4.87
6q_73331344_uff_E=637.78	-7.3	8.863	3.155
6q_73331205_uff_E=629.44	-7.3	8.255	4.665
6q_73331060_uff_E=634.29	-7.3	7.874	4.287
6q_73330763_uff_E=714.76	-7.3	8.232	3.226
6q_73330763_uff_E=714.76	-7.3	6.912	4.099
6q_73330625_uff_E=631.30	-7.3	3.421	2.312
6q_73330625_uff_E=631.30	-7.3	7.225	5.087
6q_71764911_uff_E=490.07	-7.3	8.449	5.882
6q_71764911_uff_E=490.07	-7.3	6.327	3.942
6q_71763717_uff_E=465.30	-7.3	8.398	4.675
6q_71763717_uff_E=465.30	-7.3	2.951	2.411
6q_71318422_uff_E=595.64	-7.3	6.532	3.683
6q_57393956_uff_E=482.31	-7.3	6.976	3.479
6q_56950846_uff_E=485.31	-7.3	7.877	4.968
6q_56950845_uff_E=553.08	-7.3	4.929	3.119
6q_56950842_uff_E=522.07	-7.3	7.715	3.327
6q_56924747_uff_E=515.53	-7.3	6.928	2.509
6q_56924747_uff_E=515.53	-7.3	2.114	1.714
6q_46844137_uff_E=493.79	-7.3	0	0
6q_46844083_uff_E=525.07	-7.3	8.676	5.338
6q_46844079_uff_E=544.43	-7.3	6.157	3.3
6q_44148513_uff_E=442.54	-7.3	0	0
6q_44139589_uff_E=599.15	-7.3	8.931	5.218
6q_44139588_uff_E=509.86	-7.3	8.15	4.664
6q_44139588_uff_E=509.86	-7.3	8.029	4.165
6q_44139586_uff_E=530.12	-7.3	7.995	4.023
6q_25171635_uff_E=456.32	-7.3	7.435	4.146
6q_147116578_uff_E=520.21	-7.3	2.677	2.167
6q_14067764_uff_E=703.84	-7.3	0	0
6q_137652147_uff_E=534.82	-7.3	5.563	2.351
6q_137641183_uff_E=530.84	-7.3	2.388	1.778
6q_137467381_uff_E=489.66	-7.3	6.469	3.868
6q_132286457_uff_E=528.62	-7.3	7.728	3.493
6q_132286397_uff_E=602.85	-7.3	6.258	3.354
6q_132286397_uff_E=602.85	-7.3	8.721	2.953
6q_132286359_uff_E=505.08	-7.3	7.83	2.183
6q_132286322_uff_E=531.16	-7.3	0	0
6q_132285949_uff_E=530.49	-7.3	8.016	2.997
6q_132285856_uff_E=542.41	-7.3	0	0
6q_129895481_uff_E=567.88	-7.3	7.291	3.685
6q_129895451_uff_E=502.94	-7.3	3.261	1.91
6q_129895222_uff_E=505.08	-7.3	6.163	3.36
6q_129895205_uff_E=525.50	-7.3	8.277	3.945
6q_129895087_uff_E=526.27	-7.3	8.413	3.912
6q_129894712_uff_E=519.13	-7.3	3.762	1.29
6q_127053184_uff_E=568.68	-7.3	5.021	3.569
6q_127053184_uff_E=568.68	-7.3	4.133	2.516
6q_125429841_uff_E=499.93	-7.3	4.9	3.091
6q_125429840_uff_E=506.48	-7.3	6.251	4.06
6q_125429840_uff_E=506.48	-7.3	6.795	4.208
6q_125429634_uff_E=502.94	-7.3	4.037	2.536
6q_125429498_uff_E=568.24	-7.3	4.465	2.485
6q_125429497_uff_E=567.88	-7.3	6.159	3.541
6q_125429497_uff_E=567.88	-7.3	8.666	2.702
6q_125429497_uff_E=567.88	-7.3	7.648	2.888
6q_125429497_uff_E=567.88	-7.3	7.221	3.729
6q_125429427_uff_E=542.77	-7.3	7.203	4.352
6q_125429426_uff_E=525.50	-7.3	1.963	1.489
6q_125428750_uff_E=537.29	-7.3	0	0
6q_125428703_uff_E=526.27	-7.3	8.342	3.929
6q_125427758_uff_E=519.13	-7.3	7.524	2.863
6q_123836216_uff_E=631.96	-7.3	5.169	2.842
6q_123704177_uff_E=624.00	-7.3	7.811	3.571
6q_123704177_uff_E=624.00	-7.3	6.125	3.709
6q_123293391_uff_E=636.92	-7.3	7.895	3.056
6q_123214764_uff_E=687.85	-7.3	4.535	2.358
6q_118263268_uff_E=1104.59	-7.3	6.907	2.357
6q_118263268_uff_E=1104.59	-7.3	0	0
6q_118263264_uff_E=1066.87	-7.3	3.168	2.145
6q_118263264_uff_E=1066.87	-7.3	0	0
6q_118263246_uff_E=636.92	-7.3	7.3	4.428
6q_118263246_uff_E=636.92	-7.3	7.773	2.959
6q_118254246_uff_E=635.83	-7.3	3.12	2.583
6q_118254232_uff_E=631.91	-7.3	7.983	4.066
6q_118254227_uff_E=641.19	-7.3	7.863	4.786
6q_118254216_uff_E=633.63	-7.3	8.285	3.136
6q_118254213_uff_E=644.51	-7.3	7.645	3.959
6q_118254151_uff_E=635.34	-7.3	3.757	2.801
6q_118254145_uff_E=558.28	-7.3	6.756	3.471
6q_118254145_uff_E=558.28	-7.3	3.027	2.515
6q_118254142_uff_E=558.28	-7.3	3.119	2.569
6q_118254121_uff_E=637.58	-7.3	7.902	3.775
6q_118254103_uff_E=631.96	-7.3	6.918	3.797
6q_118254083_uff_E=620.90	-7.3	8.084	4.056
6q_98058927_uff_E=293.39	-7.2	0	0
6q_98058926_uff_E=284.11	-7.2	0	0
6q_92860931_uff_E=404.45	-7.2	0	0
6q_91564943_uff_E=503.49	-7.2	6.533	2.934
6q_75218864_uff_E=499.12	-7.2	7.043	4.63
6q_75218847_uff_E=520.97	-7.2	0	0
6q_75218824_uff_E=483.43	-7.2	5.438	2.255
6q_74426566_uff_E=467.72	-7.2	7.666	4.124
6q_74426566_uff_E=467.72	-7.2	5.644	3.835
6q_73331772_uff_E=586.44	-7.2	10.923	7.311
6q_73331632_uff_E=609.71	-7.2	7.927	2.354
6q_73331348_uff_E=633.58	-7.2	6.751	3.047
6q_73331348_uff_E=633.58	-7.2	4.781	2.763
6q_73331345_uff_E=668.75	-7.2	5.318	3.454
6q_73331345_uff_E=668.75	-7.2	7.776	4.09
6q_73330912_uff_E=647.29	-7.2	2.954	2.551
6q_73330911_uff_E=636.92	-7.2	7.67	3.075
6q_73330910_uff_E=648.69	-7.2	7.36	2.54
6q_73330766_uff_E=651.99	-7.2	8.301	2.87
6q_73330766_uff_E=651.99	-7.2	5.885	2.761
6q_73330762_uff_E=621.15	-7.2	6.762	3.462
6q_73330625_uff_E=631.30	-7.2	9.794	6.457
6q_71764911_uff_E=490.07	-7.2	8.33	4.529
6q_71764911_uff_E=490.07	-7.2	8.409	4.765
6q_71763717_uff_E=465.30	-7.2	6.12	3.453
6q_71737790_uff_E=419.80	-7.2	0	0
6q_71318420_uff_E=519.02	-7.2	7.138	3.543
6q_70870984_uff_E=487.13	-7.2	8.178	4.733
6q_6452395_uff_E=485.14	-7.2	0	0
6q_629676_uff_E=362.11	-7.2	0	0
6q_620370_uff_E=467.26	-7.2	0	0
6q_620242_uff_E=487.43	-7.2	0	0
6q_617268_uff_E=361.47	-7.2	0	0
6q_57393956_uff_E=482.31	-7.2	7.128	4.456
6q_56924747_uff_E=515.53	-7.2	2.5	1.774
6q_56924747_uff_E=515.53	-7.2	5.625	2.284
6q_566721_uff_E=474.85	-7.2	0	0
6q_46844137_uff_E=493.79	-7.2	5.129	2.985
6q_46844083_uff_E=525.07	-7.2	5.659	2.175
6q_46844079_uff_E=544.43	-7.2	8.7	4.471
6q_46844023_uff_E=474.74	-7.2	0	0
6q_46843962_uff_E=816.62	-7.2	0	0
6q_44566075_uff_E=523.32	-7.2	3.043	2.265
6q_44566075_uff_E=523.32	-7.2	4.874	2.563
6q_44139590_uff_E=680.31	-7.2	6.168	3.854
6q_44139589_uff_E=599.15	-7.2	7.149	3.235
6q_44139589_uff_E=599.15	-7.2	7.252	3.663
6q_44139587_uff_E=1748.94	-7.2	7.169	3.708
6q_44139468_uff_E=480.55	-7.2	0	0
6q_25171846_uff_E=442.12	-7.2	0	0
6q_25171635_uff_E=456.32	-7.2	3.982	2.543
6q_23424433_uff_E=500.83	-7.2	0	0
6q_14565589_uff_E=493.87	-7.2	0	0
6q_14565581_uff_E=465.26	-7.2	0	0
6q_144564119_uff_E=511.99	-7.2	0	0
6q_138514334_uff_E=388.58	-7.2	0	0
6q_138490235_uff_E=829.78	-7.2	0	0
6q_132286496_uff_E=560.09	-7.2	5.021	2.123
6q_132286397_uff_E=602.85	-7.2	8.831	3.456
6q_132286322_uff_E=531.16	-7.2	6.292	3.174
6q_132286322_uff_E=531.16	-7.2	3.52	2.13
6q_132285856_uff_E=542.41	-7.2	4.741	2.76
6q_131964492_uff_E=498.10	-7.2	7.551	3.09
6q_129895618_uff_E=499.93	-7.2	8.443	4.329
6q_129895481_uff_E=567.88	-7.2	7.535	2.924
6q_129895451_uff_E=502.94	-7.2	3.3	2.369
6q_129895451_uff_E=502.94	-7.2	2.066	1.458
6q_129895451_uff_E=502.94	-7.2	4.172	2.506
6q_129894893_uff_E=493.62	-7.2	8.068	2.509
6q_127053185_uff_E=417.22	-7.2	9.766	6.771
6q_127053185_uff_E=417.22	-7.2	0	0
6q_125429841_uff_E=499.93	-7.2	8.489	4.33
6q_125429634_uff_E=502.94	-7.2	3.244	2.442
6q_125429498_uff_E=568.24	-7.2	7.564	2.725
6q_125429498_uff_E=568.24	-7.2	8.434	3.761
6q_125429498_uff_E=568.24	-7.2	4.446	2.175
6q_125429497_uff_E=567.88	-7.2	5.692	2.844
6q_125429497_uff_E=567.88	-7.2	4.818	2.708
6q_125429427_uff_E=542.77	-7.2	2.244	1.776
6q_125429427_uff_E=542.77	-7.2	7.746	2.925
6q_125429177_uff_E=507.62	-7.2	7.974	3.056
6q_125429126_uff_E=510.78	-7.2	4.575	2.795
6q_125429126_uff_E=510.78	-7.2	7.337	2.876
6q_125429126_uff_E=510.78	-7.2	8.169	2.089
6q_125428749_uff_E=493.62	-7.2	8.081	2.52
6q_125428703_uff_E=526.27	-7.2	8.205	3.258
6q_125428702_uff_E=552.27	-7.2	3.996	2.434
6q_125428702_uff_E=552.27	-7.2	4.388	2.481
6q_125427757_uff_E=524.66	-7.2	5.939	3.201
6q_125427757_uff_E=524.66	-7.2	7.491	3.182
6q_123836216_uff_E=631.96	-7.2	4.715	2.52
6q_123704177_uff_E=624.00	-7.2	7.356	3.178
6q_123293391_uff_E=636.92	-7.2	7.626	3.921
6q_123293391_uff_E=636.92	-7.2	5.228	2.125
6q_122400007_uff_E=563.29	-7.2	0	0
6q_118267073_uff_E=557.12	-7.2	6.208	2.718
6q_118267046_uff_E=447.92	-7.2	0	0
6q_118267045_uff_E=475.47	-7.2	0	0
6q_118263268_uff_E=1104.59	-7.2	6.135	3.175
6q_118263251_uff_E=515.77	-7.2	0	0
6q_118263247_uff_E=624.00	-7.2	6.649	3.627
6q_118254219_uff_E=599.83	-7.2	8.694	5.797
6q_118254213_uff_E=644.51	-7.2	6.585	3.147
6q_118254190_uff_E=511.99	-7.2	0	0
6q_118254145_uff_E=558.28	-7.2	2.505	2.057
6q_118254142_uff_E=558.28	-7.2	6.896	3.526
6q_118254103_uff_E=631.96	-7.2	6.874	3.601
6q_118254103_uff_E=631.96	-7.2	9.37	6.858
6q_118218025_uff_E=467.72	-7.2	6.393	3.722
6q_10574693_uff_E=486.37	-7.2	0	0
6q_99908084_uff_E=713.20	-7.1	0	0
6q_98058927_uff_E=293.39	-7.1	5.882	2.268
6q_91564943_uff_E=503.49	-7.1	6.281	2.316
6q_91564943_uff_E=503.49	-7.1	6.629	2.936
6q_91035900_uff_E=505.87	-7.1	8.551	2.383
6q_91035900_uff_E=505.87	-7.1	5.841	3
6q_76973812_uff_E=262.34	-7.1	0	0
6q_75218864_uff_E=499.12	-7.1	4.11	2.324
6q_75218864_uff_E=499.12	-7.1	6.75	4.403
6q_75218864_uff_E=499.12	-7.1	4.951	1.856
6q_75218864_uff_E=499.12	-7.1	4.838	2.485
6q_75218864_uff_E=499.12	-7.1	2.274	1.889
6q_75218864_uff_E=499.12	-7.1	6.951	3.513
6q_75218847_uff_E=520.97	-7.1	7.479	1.957
6q_75218824_uff_E=483.43	-7.1	5.821	3.159
6q_75218824_uff_E=483.43	-7.1	6.038	2.923
6q_74426566_uff_E=467.72	-7.1	5.497	3.288
6q_74426566_uff_E=467.72	-7.1	7.431	3.27
6q_73331632_uff_E=609.71	-7.1	8	2.248
6q_73331629_uff_E=624.62	-7.1	6.451	3.559
6q_73331628_uff_E=624.00	-7.1	6.266	3.448
6q_73331628_uff_E=624.00	-7.1	7.435	3.174
6q_73331488_uff_E=637.67	-7.1	7.32	5.098
6q_73331349_uff_E=627.67	-7.1	6.573	3.863
6q_73331347_uff_E=651.09	-7.1	8.783	5.568
6q_73331347_uff_E=651.09	-7.1	8.325	5.842
6q_73331346_uff_E=611.27	-7.1	6.479	3.805
6q_73331345_uff_E=668.75	-7.1	7.335	3.962
6q_73330912_uff_E=647.29	-7.1	6.331	3.043
6q_73330911_uff_E=636.92	-7.1	7.66	3.931
6q_73330911_uff_E=636.92	-7.1	6.47	2.812
6q_73330766_uff_E=651.99	-7.1	8.26	3.985
6q_73330762_uff_E=621.15	-7.1	6.097	3.212
6q_72726987_uff_E=607.92	-7.1	8.605	5.198
6q_71764910_uff_E=531.32	-7.1	0	0
6q_71763717_uff_E=465.30	-7.1	6.054	3.273
6q_71763717_uff_E=465.30	-7.1	7.765	4.054
6q_71317160_uff_E=364.50	-7.1	0	0
6q_6452395_uff_E=485.14	-7.1	3.79	2.214
6q_630845_uff_E=373.54	-7.1	0	0
6q_617268_uff_E=361.47	-7.1	7.223	4.195
6q_57395698_uff_E=490.56	-7.1	0	0
6q_56950845_uff_E=553.08	-7.1	8.681	4.354
6q_56924745_uff_E=399.54	-7.1	0	0
6q_46844137_uff_E=493.79	-7.1	7.41	5.134
6q_46844023_uff_E=474.74	-7.1	8.579	6.079
6q_46844022_uff_E=503.08	-7.1	1.797	1.516
6q_46844022_uff_E=503.08	-7.1	6.386	3.929
6q_46844022_uff_E=503.08	-7.1	6.558	3.552
6q_46843962_uff_E=816.62	-7.1	7.678	4.458
6q_44566031_uff_E=562.36	-7.1	6.192	3.271
6q_44139590_uff_E=680.31	-7.1	6.737	2.532
6q_25172057_uff_E=459.89	-7.1	8.316	4.676
6q_25172057_uff_E=459.89	-7.1	2.048	1.701
6q_23424433_uff_E=500.83	-7.1	7.081	4.702
6q_23424319_uff_E=490.69	-7.1	0	0
6q_14737140_uff_E=464.56	-7.1	0	0
6q_144564153_uff_E=641.96	-7.1	7.975	4.159
6q_144564145_uff_E=652.83	-7.1	6.205	3.553
6q_14067764_uff_E=703.84	-7.1	8.571	5.276
6q_138514463_uff_E=391.15	-7.1	0	0
6q_138514336_uff_E=331.78	-7.1	0	0
6q_138514334_uff_E=388.58	-7.1	6.627	4.101
6q_138514334_uff_E=388.58	-7.1	4.41	2.891
6q_137652147_uff_E=534.82	-7.1	6.642	3.52
6q_13735050_uff_E=749.67	-7.1	6.074	3.108
6q_132286496_uff_E=560.09	-7.1	7.59	3.764
6q_132286359_uff_E=505.08	-7.1	7.83	2.964
6q_132286322_uff_E=531.16	-7.1	7.769	2.426
6q_132286322_uff_E=531.16	-7.1	7.834	3.532
6q_131975184_uff_E=547.56	-7.1	7.413	2.73
6q_131975182_uff_E=561.17	-7.1	2.024	1.559
6q_129895618_uff_E=499.93	-7.1	7.939	4.729
6q_129895451_uff_E=502.94	-7.1	7.803	3.349
6q_129895205_uff_E=525.50	-7.1	1.892	1.434
6q_127053184_uff_E=568.68	-7.1	7.915	5.451
6q_125429841_uff_E=499.93	-7.1	7.969	4.701
6q_125429634_uff_E=502.94	-7.1	7.972	2.847
6q_125429634_uff_E=502.94	-7.1	8.083	3.366
6q_125429427_uff_E=542.77	-7.1	5.284	2.887
6q_125429427_uff_E=542.77	-7.1	6.592	3.292
6q_125429126_uff_E=510.78	-7.1	7.52	2.729
6q_125429126_uff_E=510.78	-7.1	2.125	1.823
6q_125429126_uff_E=510.78	-7.1	7.463	2.333
6q_125428750_uff_E=537.29	-7.1	7.342	2.458
6q_125428750_uff_E=537.29	-7.1	7.119	2.728
6q_125428749_uff_E=493.62	-7.1	7.598	2.763
6q_125427758_uff_E=519.13	-7.1	3.855	1.198
6q_124301775_uff_E=494.73	-7.1	0	0
6q_123282608_uff_E=523.14	-7.1	0	0
6q_123214764_uff_E=687.85	-7.1	7.102	3.348
6q_122400007_uff_E=563.29	-7.1	7.943	4.84
6q_118267073_uff_E=557.12	-7.1	6.374	3.579
6q_118267046_uff_E=447.92	-7.1	6.731	3.989
6q_118263269_uff_E=1102.50	-7.1	7.291	2.738
6q_118263264_uff_E=1066.87	-7.1	7.56	4.975
6q_118263250_uff_E=523.14	-7.1	0	0
6q_118263247_uff_E=624.00	-7.1	7.552	3.222
6q_118263247_uff_E=624.00	-7.1	4.791	2.632
6q_118263247_uff_E=624.00	-7.1	6.543	3.683
6q_118263245_uff_E=614.68	-7.1	0	0
6q_118263237_uff_E=588.21	-7.1	0	0
6q_118263228_uff_E=472.25	-7.1	0	0
6q_118254246_uff_E=635.83	-7.1	7.353	3.109
6q_118254216_uff_E=633.63	-7.1	8.833	2.448
6q_118254214_uff_E=630.93	-7.1	4.049	2.502
6q_118254179_uff_E=699.45	-7.1	3.426	2.574
6q_118254131_uff_E=612.52	-7.1	7.416	2.674
6q_118254131_uff_E=612.52	-7.1	7.898	2.927
6q_118254099_uff_E=523.14	-7.1	0	0
6q_118254083_uff_E=620.90	-7.1	6.616	3.994
6q_118254083_uff_E=620.90	-7.1	6.496	4.115
6q_118254083_uff_E=620.90	-7.1	5.086	2.778
6q_118218025_uff_E=467.72	-7.1	6.927	2.953
6q_118218025_uff_E=467.72	-7.1	6.596	2.994
6q_118218025_uff_E=467.72	-7.1	7.429	3.273
6q_10574693_uff_E=486.37	-7.1	8.992	5.342
6q_10097_uff_E=554.35	-7.1	0	0
6q_98125634_uff_E=613.87	-7	0	0
6q_98058925_uff_E=284.04	-7	0	0
6q_98058924_uff_E=293.41	-7	5.547	2.492
6q_98058924_uff_E=293.41	-7	8.046	5.674
6q_91035900_uff_E=505.87	-7	6.131	3.163
6q_91035900_uff_E=505.87	-7	6.535	3.646
6q_91035900_uff_E=505.87	-7	5.166	2.581
6q_89054741_uff_E=556.64	-7	0	0
6q_75218825_uff_E=478.84	-7	0	0
6q_75218801_uff_E=494.49	-7	6.167	3.101
6q_73331632_uff_E=609.71	-7	7.253	3.332
6q_73331629_uff_E=624.62	-7	6.013	3.763
6q_73331629_uff_E=624.62	-7	3.023	2.609
6q_73331491_uff_E=631.59	-7	3.453	2.182
6q_73331490_uff_E=626.42	-7	6.272	3.478
6q_73331490_uff_E=626.42	-7	6.081	3.55
6q_73331488_uff_E=637.67	-7	3.643	2.457
6q_73331347_uff_E=651.09	-7	6.149	3.787
6q_73331347_uff_E=651.09	-7	6.4	3.714
6q_73331344_uff_E=637.78	-7	8.883	3.291
6q_73331209_uff_E=661.60	-7	7.492	4.581
6q_73331209_uff_E=661.60	-7	8.844	3.147
6q_73331205_uff_E=629.44	-7	6.378	4.144
6q_73330911_uff_E=636.92	-7	7.073	2.736
6q_73330762_uff_E=621.15	-7	3.316	2.762
6q_73330625_uff_E=631.30	-7	12.382	10.737
6q_71764911_uff_E=490.07	-7	9.395	6.528
6q_71764910_uff_E=531.32	-7	7.944	4.848
6q_71318422_uff_E=595.64	-7	7.193	3.571
6q_71318422_uff_E=595.64	-7	3.765	1.925
6q_71043635_uff_E=1668.80	-7	0	0
6q_70876805_uff_E=498.65	-7	8.186	4.686
6q_68024713_uff_E=427.25	-7	0	0
6q_617713_uff_E=360.61	-7	0	0
6q_617268_uff_E=361.47	-7	5.752	3.87
6q_617268_uff_E=361.47	-7	5.916	3.267
6q_57393956_uff_E=482.31	-7	3.723	2.548
6q_57390407_uff_E=486.36	-7	0	0
6q_56950842_uff_E=522.07	-7	7.518	3.791
6q_46844137_uff_E=493.79	-7	2.015	1.48
6q_46844024_uff_E=467.06	-7	5.911	2.326
6q_46844024_uff_E=467.06	-7	9.552	6.211
6q_46844024_uff_E=467.06	-7	0	0
6q_46844023_uff_E=474.74	-7	5.774	2.388
6q_46843964_uff_E=523.87	-7	0	0
6q_46843963_uff_E=502.61	-7	6.424	3.679
6q_46843963_uff_E=502.61	-7	7.981	4.146
6q_46843962_uff_E=816.62	-7	8.839	5.156
6q_46843962_uff_E=816.62	-7	5.476	2.093
6q_46843961_uff_E=566.24	-7	0	0
6q_46843899_uff_E=466.21	-7	0	0
6q_44566075_uff_E=523.32	-7	4.981	2.774
6q_44565921_uff_E=420.30	-7	0	0
6q_44139589_uff_E=599.15	-7	7.733	2.453
6q_44139588_uff_E=509.86	-7	2.135	1.575
6q_44139588_uff_E=509.86	-7	5.617	3.301
6q_44139587_uff_E=1748.94	-7	7.422	4.693
6q_44139586_uff_E=530.12	-7	7.665	4.878
6q_44139468_uff_E=480.55	-7	1.913	1.394
6q_25172057_uff_E=459.89	-7	8.041	5.347
6q_25172057_uff_E=459.89	-7	7.589	4.244
6q_25171846_uff_E=442.12	-7	3.576	2.191
6q_23424433_uff_E=500.83	-7	8.106	3.106
6q_23424082_uff_E=486.48	-7	0	0
6q_21677661_uff_E=485.34	-7	0	0
6q_20841686_uff_E=406.51	-7	0	0
6q_195522_uff_E=471.34	-7	0	0
6q_14565587_uff_E=489.93	-7	0	0
6q_14565585_uff_E=471.35	-7	0	0
6q_144564153_uff_E=641.96	-7	5.107	2.725
6q_144564145_uff_E=652.83	-7	7.255	4.471
6q_142550538_uff_E=347.64	-7	0	0
6q_142550537_uff_E=823.03	-7	7.342	4.599
6q_142550537_uff_E=823.03	-7	6.886	4.611
6q_142550537_uff_E=823.03	-7	0	0
6q_138514336_uff_E=331.78	-7	6.594	3.477
6q_138496616_uff_E=483.72	-7	0	0
6q_138490235_uff_E=829.78	-7	7.284	4.916
6q_137652147_uff_E=534.82	-7	7.752	4.026
6q_137641183_uff_E=530.84	-7	6.206	3.511
6q_137467528_uff_E=393.76	-7	0	0
6q_137467381_uff_E=489.66	-7	6.949	2.867
6q_137467381_uff_E=489.66	-7	6.354	2.67
6q_13735050_uff_E=749.67	-7	5.513	2.574
6q_13735050_uff_E=749.67	-7	6.679	2.403
6q_135027778_uff_E=580.27	-7	7.656	3.34
6q_135027778_uff_E=580.27	-7	8.201	5.557
6q_135027778_uff_E=580.27	-7	0	0
6q_132286528_uff_E=486.36	-7	0	0
6q_132286340_uff_E=569.38	-7	0	0
6q_132286165_uff_E=526.02	-7	8.255	2.865
6q_132285949_uff_E=530.49	-7	7.579	2.84
6q_132285940_uff_E=519.13	-7	7.514	3.117
6q_131975184_uff_E=547.56	-7	8.304	3.679
6q_131975184_uff_E=547.56	-7	2.15	1.604
6q_131975182_uff_E=561.17	-7	7.106	2.121
6q_131964506_uff_E=573.49	-7	0	0
6q_131964492_uff_E=498.10	-7	4.821	2.21
6q_129895481_uff_E=567.88	-7	5.651	2.903
6q_129895451_uff_E=502.94	-7	7.892	2.501
6q_129895443_uff_E=507.32	-7	0	0
6q_129894893_uff_E=493.62	-7	7.707	2.314
6q_129894893_uff_E=493.62	-7	5.693	3.034
6q_129894893_uff_E=493.62	-7	7.579	2.745
6q_129894712_uff_E=519.13	-7	7.532	3.106
6q_127053184_uff_E=568.68	-7	2.468	1.677
6q_127053184_uff_E=568.68	-7	5.97	3.036
6q_125429986_uff_E=507.32	-7	0	0
6q_125429634_uff_E=502.94	-7	8.228	2.558
6q_125429633_uff_E=507.88	-7	8.173	2.714
6q_125429633_uff_E=507.88	-7	7.67	2.893
6q_125429427_uff_E=542.77	-7	8.292	3.279
6q_125429420_uff_E=541.67	-7	7.726	3.002
6q_125429127_uff_E=505.08	-7	4.648	3.127
6q_125429127_uff_E=505.08	-7	8.674	2.292
6q_125429126_uff_E=510.78	-7	7.569	4.563
6q_125428750_uff_E=537.29	-7	5.025	2.837
6q_125428750_uff_E=537.29	-7	3.211	1.531
6q_125428749_uff_E=493.62	-7	5.835	3.061
6q_125428702_uff_E=552.27	-7	4.805	2.796
6q_125427758_uff_E=519.13	-7	7.539	3.135
6q_125427757_uff_E=524.66	-7	5.211	2.77
6q_125427757_uff_E=524.66	-7	7.778	3.11
6q_123825667_uff_E=368.14	-7	0	0
6q_123361815_uff_E=380.82	-7	0	0
6q_123293391_uff_E=636.92	-7	7.039	2.798
6q_123282608_uff_E=523.14	-7	6.612	3.852
6q_123282608_uff_E=523.14	-7	6.896	4.211
6q_123214764_uff_E=687.85	-7	7.446	2.262
6q_118267045_uff_E=475.47	-7	3.849	2.266
6q_118263268_uff_E=1104.59	-7	7.102	2.705
6q_118263268_uff_E=1104.59	-7	3.003	2.298
6q_118263264_uff_E=1066.87	-7	7.46	5.122
6q_118263251_uff_E=515.77	-7	6.439	3.151
6q_118263250_uff_E=523.14	-7	6.912	4.22
6q_118263247_uff_E=624.00	-7	6.257	3.969
6q_118263246_uff_E=636.92	-7	6.398	3.518
6q_118263246_uff_E=636.92	-7	1.872	1.488
6q_118263245_uff_E=614.68	-7	3.649	2.636
6q_118263244_uff_E=641.96	-7	5.1	2.681
6q_118263241_uff_E=578.46	-7	7.535	2.825
6q_118263233_uff_E=562.91	-7	6.295	2.734
6q_118263231_uff_E=574.80	-7	8.713	6.024
6q_118263231_uff_E=574.80	-7	0	0
6q_118254232_uff_E=631.91	-7	5.789	4.054
6q_118254232_uff_E=631.91	-7	8.296	5.307
6q_118254232_uff_E=631.91	-7	7.274	4.084
6q_118254232_uff_E=631.91	-7	7.765	4.442
6q_118254232_uff_E=631.91	-7	8.283	4.566
6q_118254219_uff_E=599.83	-7	2.119	1.823
6q_118254216_uff_E=633.63	-7	3.619	2.537
6q_118254214_uff_E=630.93	-7	8.996	4.976
6q_118254213_uff_E=644.51	-7	6.252	3.401
6q_118254182_uff_E=641.96	-7	4.807	2.45
6q_118254182_uff_E=641.96	-7	7.291	2.743
6q_118254131_uff_E=612.52	-7	8.977	5.693
6q_118254121_uff_E=637.58	-7	3.279	2.84
6q_118254099_uff_E=523.14	-7	6.832	4.18
6q_118218025_uff_E=467.72	-7	4.888	3.23
6q_10785158_uff_E=562.11	-7	0	0
6q_10715802_uff_E=497.31	-7	0	0
6q_10623284_uff_E=545.80	-7	0	0
6q_101592379_uff_E=353.83	-7	0	0
6q_99908084_uff_E=713.20	-6.9	8.579	5.111
6q_98125637_uff_E=650.71	-6.9	0	0
6q_98058927_uff_E=293.39	-6.9	5.391	3.273
6q_98058927_uff_E=293.39	-6.9	5.943	2.913
6q_98058926_uff_E=284.11	-6.9	5.875	2.859
6q_91564943_uff_E=503.49	-6.9	6.361	2.533
6q_91564943_uff_E=503.49	-6.9	6.252	2.143
6q_89054741_uff_E=556.64	-6.9	2.419	0.558
6q_75218825_uff_E=478.84	-6.9	5.623	3.619
6q_75218801_uff_E=494.49	-6.9	6.864	2.916
6q_74426566_uff_E=467.72	-6.9	6.215	3.27
6q_74426566_uff_E=467.72	-6.9	6.747	2.988
6q_73331632_uff_E=609.71	-6.9	6.519	3.802
6q_73331628_uff_E=624.00	-6.9	1.913	1.586
6q_73331491_uff_E=631.59	-6.9	7.025	3.141
6q_73331490_uff_E=626.42	-6.9	8.55	5.758
6q_73331488_uff_E=637.67	-6.9	8.44	5.004
6q_73331348_uff_E=633.58	-6.9	2.526	2.028
6q_73331344_uff_E=637.78	-6.9	2.392	2.037
6q_73331209_uff_E=661.60	-6.9	2.392	2.179
6q_73331205_uff_E=629.44	-6.9	3.654	2.809
6q_73330910_uff_E=648.69	-6.9	7.22	3.975
6q_73330763_uff_E=714.76	-6.9	2.701	1.925
6q_71764910_uff_E=531.32	-6.9	7.599	4.022
6q_622712_uff_E=363.04	-6.9	0	0
6q_620374_uff_E=372.95	-6.9	6.306	1.582
6q_57393956_uff_E=482.31	-6.9	7.136	2.102
6q_56950843_uff_E=482.15	-6.9	0	0
6q_56950842_uff_E=522.07	-6.9	5.531	2.274
6q_56950842_uff_E=522.07	-6.9	9.095	4.985
6q_56950842_uff_E=522.07	-6.9	5.531	2.059
6q_46844137_uff_E=493.79	-6.9	5.988	2.812
6q_46844137_uff_E=493.79	-6.9	8.214	5.174
6q_46844024_uff_E=467.06	-6.9	7.456	5.244
6q_46843965_uff_E=501.88	-6.9	2.276	1.706
6q_46843965_uff_E=501.88	-6.9	0	0
6q_46843964_uff_E=523.87	-6.9	7.286	5.127
6q_46843963_uff_E=502.61	-6.9	2.051	1.767
6q_46843963_uff_E=502.61	-6.9	8.387	5.989
6q_46843899_uff_E=466.21	-6.9	2.088	1.485
6q_46843899_uff_E=466.21	-6.9	7.907	5.452
6q_44566078_uff_E=549.87	-6.9	0	0
6q_44566075_uff_E=523.32	-6.9	8.09	4.314
6q_44566065_uff_E=441.34	-6.9	0	0
6q_44566031_uff_E=562.36	-6.9	6.151	3.187
6q_44148513_uff_E=442.54	-6.9	3.675	2.434
6q_44139587_uff_E=1748.94	-6.9	7.505	2.107
6q_44139468_uff_E=480.55	-6.9	8.363	5.66
6q_25171635_uff_E=456.32	-6.9	7.008	3.809
6q_25171635_uff_E=456.32	-6.9	5.868	2.507
6q_25171635_uff_E=456.32	-6.9	4.111	2.619
6q_25171635_uff_E=456.32	-6.9	6.747	2.558
6q_25171633_uff_E=466.90	-6.9	0	0
6q_25171632_uff_E=683.46	-6.9	0	0
6q_21629991_uff_E=425.22	-6.9	0	0
6q_144564153_uff_E=641.96	-6.9	6.885	2.96
6q_144564153_uff_E=641.96	-6.9	7.06	3.784
6q_144564145_uff_E=652.83	-6.9	5.17	3.104
6q_144564145_uff_E=652.83	-6.9	6.622	3.313
6q_144564119_uff_E=511.99	-6.9	6.381	2.534
6q_142550537_uff_E=823.03	-6.9	7.404	3.944
6q_138514463_uff_E=391.15	-6.9	7.399	4.827
6q_138490235_uff_E=829.78	-6.9	4.645	3.283
6q_138490235_uff_E=829.78	-6.9	7.468	4.054
6q_137652147_uff_E=534.82	-6.9	8.095	4.192
6q_137641183_uff_E=530.84	-6.9	6.227	3.545
6q_137641183_uff_E=530.84	-6.9	7.572	4.125
6q_137467381_uff_E=489.66	-6.9	7.337	3.17
6q_13735050_uff_E=749.67	-6.9	6.808	3.468
6q_132286528_uff_E=486.36	-6.9	2.558	1.613
6q_132286496_uff_E=560.09	-6.9	8.008	3.688
6q_132286496_uff_E=560.09	-6.9	8.209	3.732
6q_132286496_uff_E=560.09	-6.9	8.677	3.466
6q_132286457_uff_E=528.62	-6.9	8.14	4.369
6q_132286340_uff_E=569.38	-6.9	8.046	2.523
6q_132286322_uff_E=531.16	-6.9	7.764	3.176
6q_132286322_uff_E=531.16	-6.9	3.385	2.427
6q_132286165_uff_E=526.02	-6.9	8.369	4.181
6q_132286165_uff_E=526.02	-6.9	5.321	1.947
6q_132285856_uff_E=542.41	-6.9	8.612	2.95
6q_131964492_uff_E=498.10	-6.9	6.799	1.985
6q_131964492_uff_E=498.10	-6.9	7.32	2.263
6q_131964492_uff_E=498.10	-6.9	5.349	2.798
6q_129895481_uff_E=567.88	-6.9	4.753	2.468
6q_129895373_uff_E=537.90	-6.9	7.875	3.955
6q_129895373_uff_E=537.90	-6.9	0	0
6q_129895222_uff_E=505.08	-6.9	4.118	2.582
6q_129895222_uff_E=505.08	-6.9	7.873	2.25
6q_129895205_uff_E=525.50	-6.9	8.352	4.096
6q_129895087_uff_E=526.27	-6.9	4.922	2.871
6q_127253416_uff_E=553.99	-6.9	0	0
6q_127053185_uff_E=417.22	-6.9	2.595	1.856
6q_127053185_uff_E=417.22	-6.9	6.21	3.238
6q_125429985_uff_E=511.44	-6.9	0	0
6q_125429841_uff_E=499.93	-6.9	8.468	4.292
6q_125429633_uff_E=507.88	-6.9	8.189	2.839
6q_125429426_uff_E=525.50	-6.9	8.325	4.215
6q_125429419_uff_E=537.90	-6.9	7.752	3.957
6q_125429419_uff_E=537.90	-6.9	0	0
6q_125429177_uff_E=507.62	-6.9	5.935	2.872
6q_125428749_uff_E=493.62	-6.9	7.66	2.306
6q_125427757_uff_E=524.66	-6.9	5.62	2.839
6q_125427757_uff_E=524.66	-6.9	7.575	2.544
6q_123836216_uff_E=631.96	-6.9	7.51	3.998
6q_123396595_uff_E=400.61	-6.9	0	0
6q_123293391_uff_E=636.92	-6.9	6.743	3.25
6q_123282608_uff_E=523.14	-6.9	6.724	3.436
6q_118267097_uff_E=473.76	-6.9	0	0
6q_118267049_uff_E=466.20	-6.9	0	0
6q_118263272_uff_E=1079.99	-6.9	3.271	2.32
6q_118263269_uff_E=1102.50	-6.9	7.376	5.138
6q_118263250_uff_E=523.14	-6.9	6.707	3.41
6q_118263250_uff_E=523.14	-6.9	6.672	3.818
6q_118263247_uff_E=624.00	-6.9	7.746	4.334
6q_118263244_uff_E=641.96	-6.9	6.914	2.952
6q_118263244_uff_E=641.96	-6.9	6.689	3.807
6q_118263241_uff_E=578.46	-6.9	6.243	3.507
6q_118263231_uff_E=574.80	-6.9	6.528	1.871
6q_118263228_uff_E=472.25	-6.9	6.512	2.17
6q_118254227_uff_E=641.19	-6.9	7.759	4.147
6q_118254227_uff_E=641.19	-6.9	7.582	4.446
6q_118254214_uff_E=630.93	-6.9	3.368	2.707
6q_118254213_uff_E=644.51	-6.9	7.775	3.02
6q_118254190_uff_E=511.99	-6.9	6.38	2.536
6q_118254179_uff_E=699.45	-6.9	5.911	3.281
6q_118254131_uff_E=612.52	-6.9	7.7	2.824
6q_118254121_uff_E=637.58	-6.9	7.914	3.85
6q_118254099_uff_E=523.14	-6.9	6.604	3.917
6q_10693960_uff_E=552.84	-6.9	0	0
6q_10687333_uff_E=410.19	-6.9	0	0
6q_10621755_uff_E=626.37	-6.9	7.456	3.931
6q_10574693_uff_E=486.37	-6.9	6.776	2.071
6q_102239942_uff_E=477.31	-6.9	0	0
6q_9974417_uff_E=422.04	-6.8	0	0
6q_98125637_uff_E=650.71	-6.8	4.532	2.044
6q_98058927_uff_E=293.39	-6.8	6.407	4.323
6q_98058927_uff_E=293.39	-6.8	6.322	2.464
6q_98058926_uff_E=284.11	-6.8	6.368	4.347
6q_98058925_uff_E=284.04	-6.8	5.164	3.103
6q_95988134_uff_E=482.23	-6.8	6.718	1.985
6q_91564943_uff_E=503.49	-6.8	8.635	5.228
6q_91035900_uff_E=505.87	-6.8	8.327	2.938
6q_76970921_uff_E=483.51	-6.8	0	0
6q_75218847_uff_E=520.97	-6.8	5.822	2.936
6q_75218847_uff_E=520.97	-6.8	5.947	3.069
6q_75218825_uff_E=478.84	-6.8	3.866	2.344
6q_75218825_uff_E=478.84	-6.8	6.821	2.876
6q_75218825_uff_E=478.84	-6.8	5.827	3.233
6q_75218801_uff_E=494.49	-6.8	5.487	2.699
6q_75218801_uff_E=494.49	-6.8	4.508	2.513
6q_75218801_uff_E=494.49	-6.8	6.385	3.561
6q_75218801_uff_E=494.49	-6.8	6.557	3.212
6q_75218801_uff_E=494.49	-6.8	5.735	3.044
6q_73331632_uff_E=609.71	-6.8	4.301	2.206
6q_73331629_uff_E=624.62	-6.8	7.06	3.94
6q_73331629_uff_E=624.62	-6.8	7.17	3.706
6q_73331628_uff_E=624.00	-6.8	7.688	3.979
6q_73331491_uff_E=631.59	-6.8	8.21	4.236
6q_73331490_uff_E=626.42	-6.8	7.977	4.263
6q_73331488_uff_E=637.67	-6.8	7.453	5.128
6q_73331348_uff_E=633.58	-6.8	6.188	2.323
6q_73331348_uff_E=633.58	-6.8	6.406	2.965
6q_73331346_uff_E=611.27	-6.8	8.057	4.274
6q_73331209_uff_E=661.60	-6.8	8.97	3.529
6q_73330912_uff_E=647.29	-6.8	7.845	3.872
6q_73330912_uff_E=647.29	-6.8	4.899	2.506
6q_73330912_uff_E=647.29	-6.8	6.977	4.063
6q_73330763_uff_E=714.76	-6.8	7.916	4.053
6q_73330763_uff_E=714.76	-6.8	8.725	2.85
6q_73330762_uff_E=621.15	-6.8	6.133	3.814
6q_73330762_uff_E=621.15	-6.8	7.717	4.707
6q_71764910_uff_E=531.32	-6.8	2.164	1.739
6q_71737790_uff_E=419.80	-6.8	6.489	2.693
6q_71318422_uff_E=595.64	-6.8	5.825	4.255
6q_71317160_uff_E=364.50	-6.8	5.773	2.851
6q_68727568_uff_E=497.72	-6.8	0	0
6q_68024713_uff_E=427.25	-6.8	7.777	4.015
6q_630845_uff_E=373.54	-6.8	9.797	6.448
6q_622712_uff_E=363.04	-6.8	5.473	2.71
6q_620370_uff_E=467.26	-6.8	5.89	3.264
6q_592609_uff_E=494.95	-6.8	0	0
6q_57397526_uff_E=321.86	-6.8	0	0
6q_57393956_uff_E=482.31	-6.8	4.214	2.318
6q_56950844_uff_E=501.37	-6.8	0	0
6q_56950843_uff_E=482.15	-6.8	5.605	2.231
6q_56950843_uff_E=482.15	-6.8	8.392	5.162
6q_46844024_uff_E=467.06	-6.8	8.448	5.962
6q_46843964_uff_E=523.87	-6.8	8.233	5.5
6q_46843964_uff_E=523.87	-6.8	2.167	1.589
6q_46843899_uff_E=466.21	-6.8	8.376	5.695
6q_44566078_uff_E=549.87	-6.8	9.526	6.597
6q_44566075_uff_E=523.32	-6.8	7.729	2.667
6q_44566031_uff_E=562.36	-6.8	7.856	5.165
6q_44139590_uff_E=680.31	-6.8	6.173	4.04
6q_44139587_uff_E=1748.94	-6.8	7.467	5.429
6q_44139587_uff_E=1748.94	-6.8	3.573	2.434
6q_44139468_uff_E=480.55	-6.8	7.332	5.135
6q_44139468_uff_E=480.55	-6.8	9.439	5.948
6q_31336_uff_E=499.84	-6.8	0	0
6q_298140_uff_E=400.18	-6.8	0	0
6q_25171637_uff_E=456.94	-6.8	0	0
6q_25171636_uff_E=493.57	-6.8	0	0
6q_25171635_uff_E=456.32	-6.8	6.525	2.346
6q_25171632_uff_E=683.46	-6.8	6.009	3.179
6q_21677662_uff_E=400.18	-6.8	0	0
6q_195522_uff_E=471.34	-6.8	6.724	4.181
6q_195521_uff_E=426.42	-6.8	0	0
6q_176431_uff_E=457.70	-6.8	0	0
6q_15086460_uff_E=467.63	-6.8	0	0
6q_147116578_uff_E=520.21	-6.8	4.904	3.134
6q_14565585_uff_E=471.35	-6.8	6.714	4.173
6q_14565584_uff_E=434.46	-6.8	0	0
6q_14565581_uff_E=465.26	-6.8	6.215	2.051
6q_139588134_uff_E=457.99	-6.8	0	0
6q_138514463_uff_E=391.15	-6.8	6.576	3.753
6q_138514334_uff_E=388.58	-6.8	8.221	5.566
6q_138496616_uff_E=483.72	-6.8	7.937	5.772
6q_138496616_uff_E=483.72	-6.8	7.144	5.302
6q_137641183_uff_E=530.84	-6.8	7.021	3.926
6q_137467381_uff_E=489.66	-6.8	7.163	3.023
6q_135027778_uff_E=580.27	-6.8	5.665	2.193
6q_135027778_uff_E=580.27	-6.8	7.769	2.941
6q_132286496_uff_E=560.09	-6.8	8.288	4.244
6q_132286457_uff_E=528.62	-6.8	5.275	3.325
6q_132286359_uff_E=505.08	-6.8	3.931	2.712
6q_132286090_uff_E=475.88	-6.8	0	0
6q_132285940_uff_E=519.13	-6.8	7.815	2.57
6q_132285856_uff_E=542.41	-6.8	5.287	2.827
6q_131975182_uff_E=561.17	-6.8	6.088	3.075
6q_129895618_uff_E=499.93	-6.8	8.491	4.219
6q_129895481_uff_E=567.88	-6.8	7.854	4.615
6q_129895443_uff_E=507.32	-6.8	7.366	3.525
6q_129895222_uff_E=505.08	-6.8	7.822	2.604
6q_129895205_uff_E=525.50	-6.8	3.893	2.456
6q_129895030_uff_E=475.88	-6.8	0	0
6q_129894893_uff_E=493.62	-6.8	8.046	2.644
6q_129603774_uff_E=553.99	-6.8	0	0
6q_129603773_uff_E=563.30	-6.8	0	0
6q_127253416_uff_E=553.99	-6.8	8.376	3.14
6q_127053184_uff_E=568.68	-6.8	7.756	4.931
6q_125429986_uff_E=507.32	-6.8	7.273	3.45
6q_125429633_uff_E=507.88	-6.8	5.722	2.764
6q_125429427_uff_E=542.77	-6.8	4.962	2.533
6q_125429177_uff_E=507.62	-6.8	3.36	2.339
6q_125429127_uff_E=505.08	-6.8	7.762	2.255
6q_125428750_uff_E=537.29	-6.8	7.854	2.592
6q_125428750_uff_E=537.29	-6.8	7.896	2.822
6q_125428750_uff_E=537.29	-6.8	5.656	2.755
6q_125428750_uff_E=537.29	-6.8	2.388	1.885
6q_125428749_uff_E=493.62	-6.8	8.084	2.716
6q_125428703_uff_E=526.27	-6.8	5.009	2.885
6q_125428416_uff_E=475.88	-6.8	0	0
6q_125427757_uff_E=524.66	-6.8	8.659	4.407
6q_125427757_uff_E=524.66	-6.8	8.05	3.411
6q_124307480_uff_E=353.26	-6.8	0	0
6q_123704177_uff_E=624.00	-6.8	7.435	4.036
6q_123282608_uff_E=523.14	-6.8	6.655	3.891
6q_123214764_uff_E=687.85	-6.8	6.87	3.348
6q_122400012_uff_E=584.80	-6.8	0	0
6q_122400007_uff_E=563.29	-6.8	5.32	3.134
6q_122400007_uff_E=563.29	-6.8	9.046	4.875
6q_118267097_uff_E=473.76	-6.8	8.502	5.956
6q_118267073_uff_E=557.12	-6.8	8.234	5.55
6q_118267052_uff_E=464.23	-6.8	0	0
6q_118263272_uff_E=1079.99	-6.8	8.899	6.113
6q_118263269_uff_E=1102.50	-6.8	3.612	1.906
6q_118263269_uff_E=1102.50	-6.8	7.156	2.755
6q_118263264_uff_E=1066.87	-6.8	8.098	5.47
6q_118263264_uff_E=1066.87	-6.8	8.602	5.916
6q_118263251_uff_E=515.77	-6.8	6.219	2.539
6q_118263251_uff_E=515.77	-6.8	8.159	5.751
6q_118263245_uff_E=614.68	-6.8	7.478	6.013
6q_118263243_uff_E=326.16	-6.8	6.16	2.444
6q_118263243_uff_E=326.16	-6.8	0	0
6q_118263241_uff_E=578.46	-6.8	7.036	3.845
6q_118263237_uff_E=588.21	-6.8	6.945	2.768
6q_118263233_uff_E=562.91	-6.8	1.046	1.037
6q_118263228_uff_E=472.25	-6.8	4.016	2.117
6q_118254246_uff_E=635.83	-6.8	7.004	3.987
6q_118254246_uff_E=635.83	-6.8	6.036	3.591
6q_118254246_uff_E=635.83	-6.8	7.284	4.668
6q_118254219_uff_E=599.83	-6.8	8.383	5.375
6q_118254190_uff_E=511.99	-6.8	8.056	5.288
6q_118254179_uff_E=699.45	-6.8	5.542	2.186
6q_118254131_uff_E=612.52	-6.8	7.393	2.505
6q_118254131_uff_E=612.52	-6.8	5.735	3.145
6q_118254131_uff_E=612.52	-6.8	7.685	4.672
6q_118254099_uff_E=523.14	-6.8	6.759	3.96
6q_10785158_uff_E=562.11	-6.8	6.514	1.904
6q_10712095_uff_E=399.63	-6.8	0	0
6q_10621755_uff_E=626.37	-6.8	5.776	2.87
6q_10574693_uff_E=486.37	-6.8	5.436	2.927
6q_98058927_uff_E=293.39	-6.7	6.701	4.699
6q_95988135_uff_E=481.81	-6.7	6.646	2.153
6q_95988135_uff_E=481.81	-6.7	6.938	2.256
6q_91820110_uff_E=337.73	-6.7	0	0
6q_91035900_uff_E=505.87	-6.7	7.91	2.976
6q_89054741_uff_E=556.64	-6.7	2.39	2.102
6q_89054741_uff_E=556.64	-6.7	5.358	2.081
6q_75218847_uff_E=520.97	-6.7	7.251	3.381
6q_75218825_uff_E=478.84	-6.7	5.975	2.411
6q_75218825_uff_E=478.84	-6.7	6.066	3.229
6q_73331629_uff_E=624.62	-6.7	6.987	4.378
6q_73331628_uff_E=624.00	-6.7	5.958	3.809
6q_73331490_uff_E=626.42	-6.7	6.585	3.25
6q_73330912_uff_E=647.29	-6.7	7.442	3.53
6q_72726987_uff_E=607.92	-6.7	9.168	2.171
6q_71764910_uff_E=531.32	-6.7	7.511	4.132
6q_71764910_uff_E=531.32	-6.7	4.48	3.112
6q_71317160_uff_E=364.50	-6.7	6.128	1.944
6q_71043635_uff_E=1668.80	-6.7	4.924	2.772
6q_6604225_uff_E=488.78	-6.7	0	0
6q_6452395_uff_E=485.14	-6.7	7.987	5.854
6q_626596_uff_E=481.66	-6.7	0	0
6q_620374_uff_E=372.95	-6.7	6.795	3.87
6q_586839_uff_E=882.59	-6.7	0	0
6q_574586_uff_E=496.46	-6.7	6.831	3.835
6q_574586_uff_E=496.46	-6.7	6.594	1.934
6q_57397526_uff_E=321.86	-6.7	6.217	2.373
6q_57395698_uff_E=490.56	-6.7	6.984	3.483
6q_56950842_uff_E=522.07	-6.7	8.804	5.237
6q_56924745_uff_E=399.54	-6.7	6.204	2.086
6q_56924745_uff_E=399.54	-6.7	5.88	3.249
6q_56691266_uff_E=482.23	-6.7	6.743	2.008
6q_46844137_uff_E=493.79	-6.7	8.014	4.905
6q_46844137_uff_E=493.79	-6.7	5.653	2.868
6q_46844024_uff_E=467.06	-6.7	2.034	1.581
6q_46843964_uff_E=523.87	-6.7	6.729	3.665
6q_46843961_uff_E=566.24	-6.7	9.204	5.892
6q_44566068_uff_E=401.62	-6.7	8.872	5.293
6q_44566068_uff_E=401.62	-6.7	0	0
6q_44566065_uff_E=441.34	-6.7	3.668	2.097
6q_25171637_uff_E=456.94	-6.7	8.768	6.652
6q_25171635_uff_E=456.32	-6.7	8.041	4.974
6q_25171633_uff_E=466.90	-6.7	9.516	6.147
6q_25171633_uff_E=466.90	-6.7	8.632	5.972
6q_23955821_uff_E=351.99	-6.7	0	0
6q_23424433_uff_E=500.83	-6.7	7.569	4.791
6q_23424319_uff_E=490.69	-6.7	6.905	3.564
6q_195522_uff_E=471.34	-6.7	6.838	4.837
6q_154593892_uff_E=383.60	-6.7	0	0
6q_148240297_uff_E=338.09	-6.7	0	0
6q_14737140_uff_E=464.56	-6.7	5.951	4.253
6q_14565587_uff_E=489.93	-6.7	6.623	4.205
6q_14565587_uff_E=489.93	-6.7	6.881	4.962
6q_14565585_uff_E=471.35	-6.7	6.825	4.859
6q_14565584_uff_E=434.46	-6.7	7.033	4.905
6q_144564153_uff_E=641.96	-6.7	8.246	4.234
6q_144564145_uff_E=652.83	-6.7	7.763	4.792
6q_144564145_uff_E=652.83	-6.7	7.572	4.335
6q_142550537_uff_E=823.03	-6.7	7.029	3.829
6q_142550519_uff_E=411.61	-6.7	0	0
6q_14067764_uff_E=703.84	-6.7	9.178	2.275
6q_138514465_uff_E=385.97	-6.7	3.553	2.086
6q_138514465_uff_E=385.97	-6.7	0	0
6q_138514463_uff_E=391.15	-6.7	3.917	2.769
6q_138514463_uff_E=391.15	-6.7	6.395	4.628
6q_138514335_uff_E=406.05	-6.7	5.917	3.447
6q_138514335_uff_E=406.05	-6.7	0	0
6q_138514334_uff_E=388.58	-6.7	7.463	4.42
6q_138496616_uff_E=483.72	-6.7	6.403	4.784
6q_138490235_uff_E=829.78	-6.7	7.525	4.077
6q_137658162_uff_E=447.07	-6.7	0	0
6q_137467524_uff_E=386.34	-6.7	0	0
6q_137467447_uff_E=315.96	-6.7	0	0
6q_137467381_uff_E=489.66	-6.7	6.132	3.605
6q_135027778_uff_E=580.27	-6.7	8.284	4.203
6q_134126307_uff_E=430.18	-6.7	0	0
6q_134126306_uff_E=422.13	-6.7	0	0
6q_133688441_uff_E=267.44	-6.7	0	0
6q_132286496_uff_E=560.09	-6.7	9.254	2.362
6q_132286457_uff_E=528.62	-6.7	3.93	2.331
6q_132286397_uff_E=602.85	-6.7	3.956	1.783
6q_132286340_uff_E=569.38	-6.7	2.53	1.969
6q_132286340_uff_E=569.38	-6.7	8.25	3.022
6q_132286322_uff_E=531.16	-6.7	5.399	3.316
6q_132286322_uff_E=531.16	-6.7	7.892	3.891
6q_132286165_uff_E=526.02	-6.7	4.7	2.848
6q_132286165_uff_E=526.02	-6.7	8.757	3.932
6q_132285949_uff_E=530.49	-6.7	3.695	1.119
6q_131975184_uff_E=547.56	-6.7	5.746	2.673
6q_131975182_uff_E=561.17	-6.7	7.816	6.216
6q_131975182_uff_E=561.17	-6.7	5.803	2.51
6q_131964492_uff_E=498.10	-6.7	7.289	2.967
6q_131964492_uff_E=498.10	-6.7	5.582	3.581
6q_129895618_uff_E=499.93	-6.7	5.869	3.687
6q_129895443_uff_E=507.32	-6.7	7.44	2.436
6q_129895443_uff_E=507.32	-6.7	7.038	3.548
6q_129895373_uff_E=537.90	-6.7	7.546	2.767
6q_129895373_uff_E=537.90	-6.7	8.344	2.604
6q_129895205_uff_E=525.50	-6.7	6.106	3.439
6q_129894893_uff_E=493.62	-6.7	8.148	2.696
6q_129894893_uff_E=493.62	-6.7	5.2	3.007
6q_129603773_uff_E=563.30	-6.7	4.898	2.554
6q_129603773_uff_E=563.30	-6.7	4.156	2.548
6q_125429986_uff_E=507.32	-6.7	7.061	3.494
6q_125429986_uff_E=507.32	-6.7	7.613	2.507
6q_125429985_uff_E=511.44	-6.7	7.322	3.83
6q_125429841_uff_E=499.93	-6.7	5.668	3.478
6q_125429633_uff_E=507.88	-6.7	8.723	2.799
6q_125429426_uff_E=525.50	-6.7	3.965	2.463
6q_125429419_uff_E=537.90	-6.7	7.462	2.853
6q_125429419_uff_E=537.90	-6.7	8.338	2.642
6q_125429177_uff_E=507.62	-6.7	8.869	2.895
6q_125429127_uff_E=505.08	-6.7	3.053	2.269
6q_125428749_uff_E=493.62	-6.7	5.193	3.032
6q_125428749_uff_E=493.62	-6.7	8.075	2.667
6q_125427758_uff_E=519.13	-6.7	8.297	3.705
6q_125427758_uff_E=519.13	-6.7	7.826	2.68
6q_123846923_uff_E=605.00	-6.7	0	0
6q_123836216_uff_E=631.96	-6.7	5.459	2.866
6q_123825667_uff_E=368.14	-6.7	6.781	4.96
6q_123704177_uff_E=624.00	-6.7	7.692	4.004
6q_123361815_uff_E=380.82	-6.7	5.835	2.906
6q_123282608_uff_E=523.14	-6.7	6.809	3.165
6q_123214764_uff_E=687.85	-6.7	6.344	3.299
6q_123214764_uff_E=687.85	-6.7	7.413	2.313
6q_118267096_uff_E=623.75	-6.7	0	0
6q_118267045_uff_E=475.47	-6.7	6.899	4.259
6q_118267045_uff_E=475.47	-6.7	6.545	2.401
6q_118263268_uff_E=1104.59	-6.7	6.291	2.908
6q_118263250_uff_E=523.14	-6.7	2.302	1.787
6q_118263247_uff_E=624.00	-6.7	7.749	4.007
6q_118263244_uff_E=641.96	-6.7	8.468	4.582
6q_118263243_uff_E=326.16	-6.7	8.227	4.851
6q_118263243_uff_E=326.16	-6.7	4.897	2.824
6q_118263243_uff_E=326.16	-6.7	5.591	2.677
6q_118263241_uff_E=578.46	-6.7	4.24	2.663
6q_118263237_uff_E=588.21	-6.7	2.187	1.81
6q_118263233_uff_E=562.91	-6.7	8.889	6.431
6q_118263233_uff_E=562.91	-6.7	8.95	6.52
6q_118254246_uff_E=635.83	-6.7	6.83	3.495
6q_118254246_uff_E=635.83	-6.7	7.683	3.671
6q_118254227_uff_E=641.19	-6.7	7.061	4.296
6q_118254227_uff_E=641.19	-6.7	5.589	3.919
6q_118254227_uff_E=641.19	-6.7	3.246	2.77
6q_118254216_uff_E=633.63	-6.7	8.122	5.944
6q_118254213_uff_E=644.51	-6.7	8.045	3.601
6q_118254182_uff_E=641.96	-6.7	5.172	2.911
6q_118254182_uff_E=641.96	-6.7	8.092	4.073
6q_118254182_uff_E=641.96	-6.7	6.266	3.115
6q_118254179_uff_E=699.45	-6.7	7.114	3.67
6q_118254121_uff_E=637.58	-6.7	7.696	4.089
6q_10837041_uff_E=552.85	-6.7	0	0
6q_10712095_uff_E=399.63	-6.7	5.908	3.213
6q_10691346_uff_E=498.60	-6.7	0	0
6q_10621755_uff_E=626.37	-6.7	7.671	4.551
6q_99908084_uff_E=713.20	-6.6	8.365	5.181
6q_98159927_uff_E=447.95	-6.6	0	0
6q_98159926_uff_E=475.82	-6.6	0	0
6q_98125636_uff_E=608.30	-6.6	0	0
6q_98125635_uff_E=587.84	-6.6	0	0
6q_98125634_uff_E=613.87	-6.6	7.31	2.038
6q_98058926_uff_E=284.11	-6.6	6.264	2.435
6q_98058925_uff_E=284.04	-6.6	6.316	4.459
6q_98058924_uff_E=293.41	-6.6	8.613	4.583
6q_95988136_uff_E=478.36	-6.6	6.609	1.91
6q_95988136_uff_E=478.36	-6.6	0	0
6q_95988133_uff_E=478.45	-6.6	0	0
6q_941385_uff_E=474.79	-6.6	0	0
6q_92860931_uff_E=404.45	-6.6	1.898	1.64
6q_90958864_uff_E=541.66	-6.6	0	0
6q_84820866_uff_E=608.30	-6.6	0	0
6q_76973812_uff_E=262.34	-6.6	6.601	3.55
6q_75218847_uff_E=520.97	-6.6	3.386	1.751
6q_75218847_uff_E=520.97	-6.6	4.757	2.395
6q_75218825_uff_E=478.84	-6.6	3.681	2.509
6q_75218825_uff_E=478.84	-6.6	5.616	3.603
6q_75218823_uff_E=527.02	-6.6	6.134	3.034
6q_75218823_uff_E=527.02	-6.6	0	0
6q_75218801_uff_E=494.49	-6.6	5.421	2.105
6q_73331628_uff_E=624.00	-6.6	6.963	3.302
6q_73331628_uff_E=624.00	-6.6	7.398	4.13
6q_73331490_uff_E=626.42	-6.6	8.648	6.665
6q_73331348_uff_E=633.58	-6.6	7.625	4.304
6q_73331346_uff_E=611.27	-6.6	10.149	8.087
6q_73330762_uff_E=621.15	-6.6	5.964	2.929
6q_71043635_uff_E=1668.80	-6.6	1.887	1.547
6q_71043635_uff_E=1668.80	-6.6	4.42	2.234
6q_70658189_uff_E=385.06	-6.6	7.789	4.041
6q_70658189_uff_E=385.06	-6.6	0	0
6q_6452395_uff_E=485.14	-6.6	6.199	3.688
6q_6452395_uff_E=485.14	-6.6	5.889	1.952
6q_629676_uff_E=362.11	-6.6	6.246	2.095
6q_626596_uff_E=481.66	-6.6	6.88	2.507
6q_626596_uff_E=481.66	-6.6	8.96	5.377
6q_622712_uff_E=363.04	-6.6	5.876	2.129
6q_620370_uff_E=467.26	-6.6	6.19	2.031
6q_617713_uff_E=360.61	-6.6	7.42	3.972
6q_617713_uff_E=360.61	-6.6	6.202	2.382
6q_617268_uff_E=361.47	-6.6	5.742	3.816
6q_617268_uff_E=361.47	-6.6	6.367	2.331
6q_617268_uff_E=361.47	-6.6	6.325	4.254
6q_611914_uff_E=389.12	-6.6	0	0
6q_57397525_uff_E=364.21	-6.6	0	0
6q_57393956_uff_E=482.31	-6.6	7.098	2.304
6q_57390407_uff_E=486.36	-6.6	6.596	3.295
6q_56950844_uff_E=501.37	-6.6	8.373	5.599
6q_56950844_uff_E=501.37	-6.6	2.314	1.602
6q_56950844_uff_E=501.37	-6.6	7.17	5.105
6q_56950843_uff_E=482.15	-6.6	9.21	5.796
6q_56950842_uff_E=522.07	-6.6	5.708	2.621
6q_56924746_uff_E=397.29	-6.6	3.443	2.306
6q_56924746_uff_E=397.29	-6.6	0	0
6q_566721_uff_E=474.85	-6.6	6.19	3.315
6q_46844137_uff_E=493.79	-6.6	3.997	2.474
6q_46844024_uff_E=467.06	-6.6	5.91	3.14
6q_46843965_uff_E=501.88	-6.6	8.24	5.031
6q_46843965_uff_E=501.88	-6.6	7.52	5.134
6q_46843962_uff_E=816.62	-6.6	8.74	6.823
6q_46843962_uff_E=816.62	-6.6	6.774	3.494
6q_46843962_uff_E=816.62	-6.6	2.118	1.598
6q_46843899_uff_E=466.21	-6.6	6.016	3.157
6q_44566078_uff_E=549.87	-6.6	8.118	5.569
6q_44566078_uff_E=549.87	-6.6	8.537	5.873
6q_44566078_uff_E=549.87	-6.6	6.955	3.857
6q_44566075_uff_E=523.32	-6.6	8.434	4.023
6q_44566068_uff_E=401.62	-6.6	6.829	2.472
6q_44566051_uff_E=374.99	-6.6	0	0
6q_44566031_uff_E=562.36	-6.6	6.901	3.668
6q_44566031_uff_E=562.36	-6.6	6.408	3.038
6q_44566031_uff_E=562.36	-6.6	6.186	2.499
6q_44139590_uff_E=680.31	-6.6	3.656	2.002
6q_44139587_uff_E=1748.94	-6.6	4.248	2.409
6q_44139586_uff_E=530.12	-6.6	6.07	3.464
6q_44139586_uff_E=530.12	-6.6	6.693	3.941
6q_44139586_uff_E=530.12	-6.6	6.836	3.112
6q_25171632_uff_E=683.46	-6.6	5.648	2.409
6q_25171632_uff_E=683.46	-6.6	1.4	1.2
6q_25171428_uff_E=435.54	-6.6	0	0
6q_23424433_uff_E=500.83	-6.6	10.287	6.565
6q_23424321_uff_E=494.61	-6.6	0	0
6q_23424320_uff_E=445.80	-6.6	0	0
6q_23424319_uff_E=490.69	-6.6	7.229	4.515
6q_23424082_uff_E=486.48	-6.6	6.867	1.947
6q_23424082_uff_E=486.48	-6.6	6.589	3.297
6q_21820746_uff_E=391.93	-6.6	0	0
6q_21677662_uff_E=400.18	-6.6	4.299	2.508
6q_21677661_uff_E=485.34	-6.6	6.491	1.909
6q_21629991_uff_E=425.22	-6.6	6.346	1.91
6q_195521_uff_E=426.42	-6.6	6.892	4.868
6q_195521_uff_E=426.42	-6.6	6.708	3.955
6q_161302_uff_E=363.38	-6.6	0	0
6q_154593892_uff_E=383.60	-6.6	6.048	3.877
6q_154593892_uff_E=383.60	-6.6	7.047	5.305
6q_154593892_uff_E=383.60	-6.6	7.925	5.677
6q_153989287_uff_E=412.33	-6.6	0	0
6q_148240297_uff_E=338.09	-6.6	6.892	3.563
6q_148240297_uff_E=338.09	-6.6	6.785	3.414
6q_148240297_uff_E=338.09	-6.6	1.714	1.248
6q_147116578_uff_E=520.21	-6.6	8.137	2.524
6q_147116578_uff_E=520.21	-6.6	4.717	2.34
6q_14706665_uff_E=484.89	-6.6	0	0
6q_14565583_uff_E=446.70	-6.6	0	0
6q_144564145_uff_E=652.83	-6.6	8.221	2.82
6q_144564061_uff_E=397.26	-6.6	0	0
6q_142550538_uff_E=347.64	-6.6	7.003	4.511
6q_142550538_uff_E=347.64	-6.6	6.245	4.218
6q_14067764_uff_E=703.84	-6.6	9.28	2.401
6q_139588134_uff_E=457.99	-6.6	6.617	2.038
6q_138514336_uff_E=331.78	-6.6	7.455	5.542
6q_138514336_uff_E=331.78	-6.6	8.426	5.571
6q_138514336_uff_E=331.78	-6.6	5.674	3.626
6q_138514336_uff_E=331.78	-6.6	5.365	2.913
6q_138514335_uff_E=406.05	-6.6	8.093	5.619
6q_138514335_uff_E=406.05	-6.6	6.131	4.027
6q_138514334_uff_E=388.58	-6.6	10.161	8.02
6q_138514334_uff_E=388.58	-6.6	7.026	5.019
6q_138514334_uff_E=388.58	-6.6	8.01	5.702
6q_138496616_uff_E=483.72	-6.6	7.692	3.965
6q_137652147_uff_E=534.82	-6.6	7.966	5.057
6q_137467528_uff_E=393.76	-6.6	6.182	3.741
6q_137467528_uff_E=393.76	-6.6	6.082	1.921
6q_137467524_uff_E=386.34	-6.6	6.318	3.813
6q_137467367_uff_E=372.94	-6.6	0	0
6q_135027778_uff_E=580.27	-6.6	5.332	2.998
6q_135027778_uff_E=580.27	-6.6	3.614	2.267
6q_135027778_uff_E=580.27	-6.6	7.316	3.255
6q_132286528_uff_E=486.36	-6.6	4.072	2.227
6q_132286528_uff_E=486.36	-6.6	2.059	1.296
6q_132286457_uff_E=528.62	-6.6	7.561	3.72
6q_132286457_uff_E=528.62	-6.6	7.665	3.342
6q_132286340_uff_E=569.38	-6.6	7.828	3.127
6q_132285949_uff_E=530.49	-6.6	7.924	3.09
6q_132285949_uff_E=530.49	-6.6	8.878	3.31
6q_132285949_uff_E=530.49	-6.6	7.354	2.79
6q_132285949_uff_E=530.49	-6.6	8.357	2.717
6q_132285940_uff_E=519.13	-6.6	5.509	3.188
6q_132285940_uff_E=519.13	-6.6	7.713	2.971
6q_132285856_uff_E=542.41	-6.6	6.389	3.095
6q_132285856_uff_E=542.41	-6.6	6.031	2.844
6q_132285856_uff_E=542.41	-6.6	5.828	3.209
6q_131975182_uff_E=561.17	-6.6	7.744	3.046
6q_131975182_uff_E=561.17	-6.6	8.456	2.832
6q_131964506_uff_E=573.49	-6.6	7.33	3.728
6q_131770040_uff_E=354.57	-6.6	3.726	2.202
6q_131770040_uff_E=354.57	-6.6	0	0
6q_129895443_uff_E=507.32	-6.6	7.922	2.561
6q_129895443_uff_E=507.32	-6.6	2.36	1.376
6q_129895373_uff_E=537.90	-6.6	3.663	1.103
6q_129894893_uff_E=493.62	-6.6	8.65	2.713
6q_129894712_uff_E=519.13	-6.6	7.858	2.788
6q_129603773_uff_E=563.30	-6.6	8.316	2.688
6q_127053185_uff_E=417.22	-6.6	5.672	3.616
6q_127053185_uff_E=417.22	-6.6	6.161	3.354
6q_125429633_uff_E=507.88	-6.6	7.716	2.361
6q_125429633_uff_E=507.88	-6.6	4.848	2.979
6q_125429426_uff_E=525.50	-6.6	6.123	3.456
6q_125429420_uff_E=541.67	-6.6	5.08	2.776
6q_125429177_uff_E=507.62	-6.6	5.337	2.923
6q_125429177_uff_E=507.62	-6.6	7.885	3.025
6q_125429127_uff_E=505.08	-6.6	8.494	3.252
6q_125428749_uff_E=493.62	-6.6	7.139	3.484
6q_125428703_uff_E=526.27	-6.6	5.429	1.759
6q_125428702_uff_E=552.27	-6.6	9.766	4.914
6q_125427758_uff_E=519.13	-6.6	8.366	3.784
6q_123825667_uff_E=368.14	-6.6	6.119	2.08
6q_123825667_uff_E=368.14	-6.6	6.459	2.628
6q_123704177_uff_E=624.00	-6.6	6.883	3.306
6q_123361815_uff_E=380.82	-6.6	6.165	1.972
6q_123282608_uff_E=523.14	-6.6	8.06	2.284
6q_122400012_uff_E=584.80	-6.6	6.823	2.637
6q_122400012_uff_E=584.80	-6.6	8.77	4.849
6q_118267131_uff_E=382.54	-6.6	0	0
6q_118267097_uff_E=473.76	-6.6	7.772	4.748
6q_118267097_uff_E=473.76	-6.6	6.024	2.12
6q_118267096_uff_E=623.75	-6.6	3.186	2.01
6q_118267096_uff_E=623.75	-6.6	6.564	2.571
6q_118263272_uff_E=1079.99	-6.6	4.459	2.283
6q_118263269_uff_E=1102.50	-6.6	7.259	4.196
6q_118263251_uff_E=515.77	-6.6	8.239	4.885
6q_118263250_uff_E=523.14	-6.6	6.738	2.985
6q_118263248_uff_E=603.75	-6.6	6.173	3.217
6q_118263248_uff_E=603.75	-6.6	0	0
6q_118263245_uff_E=614.68	-6.6	6.675	3.383
6q_118263244_uff_E=641.96	-6.6	4.99	2.866
6q_118263243_uff_E=326.16	-6.6	5.485	3.324
6q_118263243_uff_E=326.16	-6.6	5.92	3.53
6q_118263243_uff_E=326.16	-6.6	3.878	2.382
6q_118263241_uff_E=578.46	-6.6	7.487	3.825
6q_118263241_uff_E=578.46	-6.6	3.856	2.209
6q_118263237_uff_E=588.21	-6.6	1.757	1.556
6q_118263237_uff_E=588.21	-6.6	6.414	3.462
6q_118263237_uff_E=588.21	-6.6	2.947	2.373
6q_118263233_uff_E=562.91	-6.6	6.274	2.862
6q_118263233_uff_E=562.91	-6.6	7.365	4.531
6q_118263231_uff_E=574.80	-6.6	7.24	3.731
6q_118263231_uff_E=574.80	-6.6	6.98	2.968
6q_118263231_uff_E=574.80	-6.6	7.871	5.288
6q_118263231_uff_E=574.80	-6.6	9.122	7.421
6q_118254219_uff_E=599.83	-6.6	6.957	3.951
6q_118254190_uff_E=511.99	-6.6	8.846	5.566
6q_118254182_uff_E=641.96	-6.6	5.795	2.767
6q_118254179_uff_E=699.45	-6.6	7.848	4.004
6q_118254131_uff_E=612.52	-6.6	5.331	2.808
6q_118254121_uff_E=637.58	-6.6	8.709	4.868
6q_118254099_uff_E=523.14	-6.6	8.141	2.288
6q_118207067_uff_E=773.99	-6.6	0	0
6q_118207010_uff_E=1815.50	-6.6	0	0
6q_10837041_uff_E=552.85	-6.6	3.289	2.266
6q_10787978_uff_E=533.30	-6.6	3.082	2.155
6q_10787978_uff_E=533.30	-6.6	0	0
6q_10693960_uff_E=552.84	-6.6	3.385	2.419
6q_10687333_uff_E=410.19	-6.6	3.159	1.543
6q_10687333_uff_E=410.19	-6.6	5.476	2.792
6q_10623284_uff_E=545.80	-6.6	8.542	5.606
6q_10621755_uff_E=626.37	-6.6	6.955	4.198
6q_10621755_uff_E=626.37	-6.6	5.926	2.904
6q_10574693_uff_E=486.37	-6.6	5.66	2.866
6q_10497262_uff_E=397.63	-6.6	0	0
6q_10097_uff_E=554.35	-6.6	6.48	1.914
6q_10019062_uff_E=415.66	-6.6	0	0
6q_98159926_uff_E=475.82	-6.5	7.536	4.559
6q_98125637_uff_E=650.71	-6.5	7.766	2.814
6q_98058926_uff_E=284.11	-6.5	5.76	2
6q_98058925_uff_E=284.04	-6.5	6.442	4.019
6q_98058925_uff_E=284.04	-6.5	6.982	4.404
6q_98058924_uff_E=293.41	-6.5	6.238	2.583
6q_98058924_uff_E=293.41	-6.5	8.433	5.46
6q_95988135_uff_E=481.81	-6.5	3.624	1.87
6q_95988134_uff_E=482.23	-6.5	6.813	2.27
6q_92860931_uff_E=404.45	-6.5	6.226	3.392
6q_92222231_uff_E=448.41	-6.5	0	0
6q_90958864_uff_E=541.66	-6.5	6.209	2.991
6q_90958864_uff_E=541.66	-6.5	5.426	2.052
6q_89798228_uff_E=373.07	-6.5	0	0
6q_89054741_uff_E=556.64	-6.5	3.097	2.07
6q_89054741_uff_E=556.64	-6.5	7.999	4.566
6q_89054741_uff_E=556.64	-6.5	7.711	3.578
6q_89054741_uff_E=556.64	-6.5	7.91	4.03
6q_85199072_uff_E=427.63	-6.5	0	0
6q_76973812_uff_E=262.34	-6.5	6.456	4.514
6q_76973167_uff_E=599.22	-6.5	5.994	2.411
6q_76973167_uff_E=599.22	-6.5	0	0
6q_76970921_uff_E=483.51	-6.5	6.951	4.827
6q_76968174_uff_E=424.16	-6.5	5.599	3.454
6q_76968174_uff_E=424.16	-6.5	0	0
6q_75218847_uff_E=520.97	-6.5	6.158	2.363
6q_75218847_uff_E=520.97	-6.5	6.972	2.769
6q_75218823_uff_E=527.02	-6.5	6.111	2.098
6q_73331632_uff_E=609.71	-6.5	7.614	2.297
6q_73331632_uff_E=609.71	-6.5	8.721	5.167
6q_73331629_uff_E=624.62	-6.5	7.528	4.284
6q_73330912_uff_E=647.29	-6.5	6.124	2.881
6q_73330910_uff_E=648.69	-6.5	2.24	1.76
6q_73053256_uff_E=792.96	-6.5	0	0
6q_72726987_uff_E=607.92	-6.5	8.309	5.367
6q_72726987_uff_E=607.92	-6.5	5.441	4.021
6q_71777464_uff_E=374.80	-6.5	9.263	6.748
6q_71777464_uff_E=374.80	-6.5	0	0
6q_71764910_uff_E=531.32	-6.5	8.33	4.406
6q_71318420_uff_E=519.02	-6.5	6.964	3.669
6q_71317160_uff_E=364.50	-6.5	6.799	4.125
6q_71317160_uff_E=364.50	-6.5	5.792	4.093
6q_70658189_uff_E=385.06	-6.5	6.274	2.344
6q_68024713_uff_E=427.25	-6.5	9.114	5.8
6q_6452395_uff_E=485.14	-6.5	6.836	4.803
6q_6452395_uff_E=485.14	-6.5	5.71	2.749
6q_622712_uff_E=363.04	-6.5	6.415	4.396
6q_620374_uff_E=372.95	-6.5	7.818	5.169
6q_620374_uff_E=372.95	-6.5	3.801	2.484
6q_620368_uff_E=417.12	-6.5	0	0
6q_620360_uff_E=444.66	-6.5	0	0
6q_620242_uff_E=487.43	-6.5	6.236	3.821
6q_617268_uff_E=361.47	-6.5	6.852	4.851
6q_611918_uff_E=475.46	-6.5	6.157	1.6
6q_611918_uff_E=475.46	-6.5	3.475	2.303
6q_611918_uff_E=475.46	-6.5	0	0
6q_586839_uff_E=882.59	-6.5	9.1	6.334
6q_586839_uff_E=882.59	-6.5	3.284	2.309
6q_57397526_uff_E=321.86	-6.5	6.741	4.536
6q_57397525_uff_E=364.21	-6.5	7.065	5.1
6q_57395698_uff_E=490.56	-6.5	7.232	4.461
6q_57395698_uff_E=490.56	-6.5	7.161	2.001
6q_57393956_uff_E=482.31	-6.5	3.743	2.754
6q_57393956_uff_E=482.31	-6.5	6.34	4.155
6q_57390407_uff_E=486.36	-6.5	6.933	4.271
6q_57390407_uff_E=486.36	-6.5	6.87	1.937
6q_56950843_uff_E=482.15	-6.5	5.855	2.452
6q_56950843_uff_E=482.15	-6.5	8.474	4.41
6q_56950704_uff_E=442.06	-6.5	0	0
6q_56691266_uff_E=482.23	-6.5	6.869	2.442
6q_46844024_uff_E=467.06	-6.5	8.014	5.514
6q_46844023_uff_E=474.74	-6.5	1.583	1.355
6q_46843965_uff_E=501.88	-6.5	5.451	2.581
6q_46843962_uff_E=816.62	-6.5	8.136	5.78
6q_46843961_uff_E=566.24	-6.5	7.685	5.343
6q_46843899_uff_E=466.21	-6.5	4.718	2.96
6q_44566075_uff_E=523.32	-6.5	8.447	4.74
6q_44566068_uff_E=401.62	-6.5	3.74	1.89
6q_44566031_uff_E=562.36	-6.5	8.075	4.587
6q_44566031_uff_E=562.36	-6.5	8.415	4.586
6q_44565921_uff_E=420.30	-6.5	6.235	3.142
6q_44139590_uff_E=680.31	-6.5	2.193	1.982
6q_44139590_uff_E=680.31	-6.5	6.695	3.908
6q_44139590_uff_E=680.31	-6.5	6.808	3.221
6q_44139586_uff_E=530.12	-6.5	7.189	3.458
6q_44139468_uff_E=480.55	-6.5	5.49	2.914
6q_44139468_uff_E=480.55	-6.5	6.171	3.136
6q_44139468_uff_E=480.55	-6.5	7.847	5.225
6q_298140_uff_E=400.18	-6.5	6.524	4.474
6q_298140_uff_E=400.18	-6.5	5.824	2.06
6q_253250_uff_E=428.28	-6.5	0	0
6q_25172057_uff_E=459.89	-6.5	8.318	5.166
6q_25171637_uff_E=456.94	-6.5	5.769	2.466
6q_25171633_uff_E=466.90	-6.5	5.778	2.326
6q_25171633_uff_E=466.90	-6.5	9.101	5.868
6q_25171632_uff_E=683.46	-6.5	7.733	5.013
6q_23424433_uff_E=500.83	-6.5	2.168	1.555
6q_23424321_uff_E=494.61	-6.5	7.469	3.62
6q_23424319_uff_E=490.69	-6.5	7.184	1.985
6q_23424318_uff_E=443.60	-6.5	0	0
6q_21677662_uff_E=400.18	-6.5	6.558	4.514
6q_21677662_uff_E=400.18	-6.5	5.539	2.805
6q_21677662_uff_E=400.18	-6.5	5.823	2.058
6q_20841686_uff_E=406.51	-6.5	6.136	3.03
6q_20841686_uff_E=406.51	-6.5	6.696	4.444
6q_195522_uff_E=471.34	-6.5	6.114	1.923
6q_154593892_uff_E=383.60	-6.5	6.497	4.284
6q_15086460_uff_E=467.63	-6.5	6.942	4.778
6q_15086460_uff_E=467.63	-6.5	6.66	4.158
6q_148240297_uff_E=338.09	-6.5	2.051	1.337
6q_147116578_uff_E=520.21	-6.5	7.58	3.033
6q_14706665_uff_E=484.89	-6.5	6.569	3.571
6q_14565585_uff_E=471.35	-6.5	6.121	1.929
6q_14565584_uff_E=434.46	-6.5	6.768	4.084
6q_14565583_uff_E=446.70	-6.5	6.864	4.028
6q_14565581_uff_E=465.26	-6.5	6.842	4.559
6q_144564119_uff_E=511.99	-6.5	6.322	3.17
6q_144564061_uff_E=397.26	-6.5	6.425	3.705
6q_144564061_uff_E=397.26	-6.5	6.082	2.152
6q_142550538_uff_E=347.64	-6.5	6.713	4.096
6q_142550538_uff_E=347.64	-6.5	6.775	5.174
6q_142550537_uff_E=823.03	-6.5	7.068	3.333
6q_142550537_uff_E=823.03	-6.5	7.126	4.181
6q_142550524_uff_E=360.94	-6.5	0	0
6q_142550519_uff_E=411.61	-6.5	10.396	7.531
6q_142550519_uff_E=411.61	-6.5	10.611	8.083
6q_138514336_uff_E=331.78	-6.5	5.259	3.588
6q_138514336_uff_E=331.78	-6.5	8.923	7.055
6q_138514335_uff_E=406.05	-6.5	8.37	6.004
6q_138514335_uff_E=406.05	-6.5	7.197	4.983
6q_138514335_uff_E=406.05	-6.5	8.079	4.746
6q_138514334_uff_E=388.58	-6.5	6.925	4.081
6q_138496616_uff_E=483.72	-6.5	3.94	2.373
6q_138496616_uff_E=483.72	-6.5	7.611	4.311
6q_138490235_uff_E=829.78	-6.5	7.032	4.64
6q_137652147_uff_E=534.82	-6.5	5.677	2.305
6q_137647518_uff_E=469.45	-6.5	0	0
6q_137467528_uff_E=393.76	-6.5	6.635	4.226
6q_137467524_uff_E=386.34	-6.5	6.1	1.918
6q_137467447_uff_E=315.96	-6.5	3.71	2.273
6q_132286528_uff_E=486.36	-6.5	8.118	2.359
6q_132286528_uff_E=486.36	-6.5	7.884	3.468
6q_132286457_uff_E=528.62	-6.5	6.098	4.489
6q_132286340_uff_E=569.38	-6.5	5.616	3.323
6q_132286340_uff_E=569.38	-6.5	7.729	2.698
6q_132286340_uff_E=569.38	-6.5	3.738	1.988
6q_132286165_uff_E=526.02	-6.5	5.553	3.276
6q_132286165_uff_E=526.02	-6.5	9.36	2.542
6q_132286090_uff_E=475.88	-6.5	2.606	1.819
6q_132286090_uff_E=475.88	-6.5	7.335	3.513
6q_132286090_uff_E=475.88	-6.5	7.84	4.331
6q_132286090_uff_E=475.88	-6.5	7.345	2.388
6q_132285949_uff_E=530.49	-6.5	8.626	2.544
6q_132285856_uff_E=542.41	-6.5	5.417	2.802
6q_132285856_uff_E=542.41	-6.5	4.526	2.598
6q_131975184_uff_E=547.56	-6.5	5.95	3.187
6q_131975184_uff_E=547.56	-6.5	5.072	2.127
6q_131964506_uff_E=573.49	-6.5	8.47	6.091
6q_129895443_uff_E=507.32	-6.5	7.687	2.421
6q_129895443_uff_E=507.32	-6.5	8.216	4.573
6q_129895443_uff_E=507.32	-6.5	4.838	2.661
6q_129895087_uff_E=526.27	-6.5	5.161	1.871
6q_129895030_uff_E=475.88	-6.5	7.263	2.404
6q_129895030_uff_E=475.88	-6.5	7.243	3.59
6q_129895030_uff_E=475.88	-6.5	2.582	1.807
6q_129895030_uff_E=475.88	-6.5	6.908	3.642
6q_129895030_uff_E=475.88	-6.5	7.824	4.306
6q_129894712_uff_E=519.13	-6.5	7.876	3.722
6q_129894712_uff_E=519.13	-6.5	7.756	2.954
6q_129603774_uff_E=553.99	-6.5	8.213	3.094
6q_129603773_uff_E=563.30	-6.5	6.854	2.766
6q_129603773_uff_E=563.30	-6.5	9.222	3.717
6q_129603773_uff_E=563.30	-6.5	8.733	2.301
6q_127053185_uff_E=417.22	-6.5	6.593	3.89
6q_125429986_uff_E=507.32	-6.5	4.837	2.67
6q_125429985_uff_E=511.44	-6.5	3.349	2.155
6q_125429985_uff_E=511.44	-6.5	5.138	3.283
6q_125429985_uff_E=511.44	-6.5	7.629	2.57
6q_125429426_uff_E=525.50	-6.5	7.749	4.884
6q_125429419_uff_E=537.90	-6.5	3.741	1.294
6q_125429177_uff_E=507.62	-6.5	7.434	3.703
6q_125428417_uff_E=471.95	-6.5	0	0
6q_125428416_uff_E=475.88	-6.5	2.602	1.765
6q_125428416_uff_E=475.88	-6.5	7.831	4.304
6q_125428416_uff_E=475.88	-6.5	7.311	2.395
6q_125428416_uff_E=475.88	-6.5	6.951	3.592
6q_125427758_uff_E=519.13	-6.5	7.712	3.071
6q_124301776_uff_E=496.28	-6.5	0	0
6q_124301775_uff_E=494.73	-6.5	6.555	4.623
6q_124301775_uff_E=494.73	-6.5	6.299	3.065
6q_124024037_uff_E=377.64	-6.5	5.568	2.432
6q_124024037_uff_E=377.64	-6.5	0	0
6q_123846923_uff_E=605.00	-6.5	5.892	3.925
6q_123396595_uff_E=400.61	-6.5	3.515	2.216
6q_122400007_uff_E=563.29	-6.5	5.256	2.332
6q_118267131_uff_E=382.54	-6.5	4.362	2.382
6q_118267096_uff_E=623.75	-6.5	4.811	2.974
6q_118267096_uff_E=623.75	-6.5	6.496	3.846
6q_118267052_uff_E=464.23	-6.5	2.9	2.347
6q_118267046_uff_E=447.92	-6.5	6.296	1.931
6q_118267045_uff_E=475.47	-6.5	6.334	2.099
6q_118267042_uff_E=443.73	-6.5	6.035	3.859
6q_118267042_uff_E=443.73	-6.5	0	0
6q_118263272_uff_E=1079.99	-6.5	7.752	4.778
6q_118263269_uff_E=1102.50	-6.5	4.862	2.826
6q_118263269_uff_E=1102.50	-6.5	7.586	4.791
6q_118263264_uff_E=1066.87	-6.5	6.004	2.668
6q_118263250_uff_E=523.14	-6.5	8.082	2.301
6q_118263248_uff_E=603.75	-6.5	7.298	3.239
6q_118263245_uff_E=614.68	-6.5	3.154	2.438
6q_118263243_uff_E=326.16	-6.5	8.319	5.748
6q_118263237_uff_E=588.21	-6.5	2.625	2.209
6q_118263231_uff_E=574.80	-6.5	4.815	2.987
6q_118263231_uff_E=574.80	-6.5	5.976	4.196
6q_118263228_uff_E=472.25	-6.5	7.477	5.118
6q_118254227_uff_E=641.19	-6.5	6.342	3.336
6q_118254219_uff_E=599.83	-6.5	6.109	2.461
6q_118254190_uff_E=511.99	-6.5	6.315	3.197
6q_118254190_uff_E=511.99	-6.5	3.18	2.285
6q_11603327_uff_E=498.67	-6.5	0	0
6q_10837041_uff_E=552.85	-6.5	8.576	5.685
6q_10787978_uff_E=533.30	-6.5	6.165	2.698
6q_10761572_uff_E=428.30	-6.5	0	0
6q_10715802_uff_E=497.31	-6.5	6.777	3.066
6q_10693960_uff_E=552.84	-6.5	6.875	3.929
6q_10691458_uff_E=474.28	-6.5	7.596	3.894
6q_10691458_uff_E=474.28	-6.5	0	0
6q_10691346_uff_E=498.60	-6.5	6.373	3.786
6q_10691346_uff_E=498.60	-6.5	3.423	2.076
6q_10690292_uff_E=457.16	-6.5	0	0
6q_10687333_uff_E=410.19	-6.5	6.33	4.034
6q_10623284_uff_E=545.80	-6.5	6.16	2.798
6q_10623284_uff_E=545.80	-6.5	3.119	2.198
6q_102239942_uff_E=477.31	-6.5	6.533	1.942
6q_102066898_uff_E=415.66	-6.5	3.925	2.683
6q_102066898_uff_E=415.66	-6.5	0	0
6q_10097_uff_E=554.35	-6.5	6.34	3.195
6q_10019062_uff_E=415.66	-6.5	5.96	3.185
6q_9974417_uff_E=422.04	-6.4	6.474	3.468
6q_9974417_uff_E=422.04	-6.4	6.69	4.563
6q_98125637_uff_E=650.71	-6.4	4.901	2.37
6q_98125637_uff_E=650.71	-6.4	7.113	2.421
6q_98058926_uff_E=284.11	-6.4	6.52	4.806
6q_98058925_uff_E=284.04	-6.4	6.682	4.818
6q_978395_uff_E=436.39	-6.4	0	0
6q_978391_uff_E=427.59	-6.4	0	0
6q_95988136_uff_E=478.36	-6.4	6.363	2.519
6q_95988134_uff_E=482.23	-6.4	3.724	2.246
6q_95988133_uff_E=478.45	-6.4	3.83	2.037
6q_95988133_uff_E=478.45	-6.4	6.628	1.873
6q_92860931_uff_E=404.45	-6.4	6.788	4.256
6q_92860931_uff_E=404.45	-6.4	6.171	2.033
6q_92860931_uff_E=404.45	-6.4	6.461	2.32
6q_91820110_uff_E=337.73	-6.4	6.101	3.334
6q_91564943_uff_E=503.49	-6.4	8.59	5.251
6q_91109362_uff_E=525.20	-6.4	0	0
6q_89798228_uff_E=373.07	-6.4	3.68	2.157
6q_76973167_uff_E=599.22	-6.4	6.255	3.638
6q_76973167_uff_E=599.22	-6.4	6.804	4.628
6q_76968174_uff_E=424.16	-6.4	8.668	5.99
6q_76964619_uff_E=417.09	-6.4	0	0
6q_75641496_uff_E=414.15	-6.4	9.443	6.921
6q_75641496_uff_E=414.15	-6.4	4.804	2.897
6q_75641496_uff_E=414.15	-6.4	0	0
6q_73331632_uff_E=609.71	-6.4	4.608	2.441
6q_73330910_uff_E=648.69	-6.4	8.298	5.448
6q_72726987_uff_E=607.92	-6.4	2.309	1.13
6q_71777464_uff_E=374.80	-6.4	7.599	4.63
6q_71764910_uff_E=531.32	-6.4	5.382	2
6q_71737790_uff_E=419.80	-6.4	6.763	3.839
6q_71318422_uff_E=595.64	-6.4	6.544	4.357
6q_71318420_uff_E=519.02	-6.4	6.607	3.342
6q_71317161_uff_E=422.79	-6.4	0	0
6q_71317160_uff_E=364.50	-6.4	6.661	4.767
6q_71312580_uff_E=422.79	-6.4	0	0
6q_71043635_uff_E=1668.80	-6.4	6.391	2.372
6q_68727568_uff_E=497.72	-6.4	6.197	3.053
6q_68024713_uff_E=427.25	-6.4	5.895	3.116
6q_6713927_uff_E=497.21	-6.4	0	0
6q_6604225_uff_E=488.78	-6.4	6.947	4.846
6q_6452395_uff_E=485.14	-6.4	9.039	6.549
6q_626596_uff_E=481.66	-6.4	6.427	2.047
6q_626596_uff_E=481.66	-6.4	7.324	4.097
6q_622712_uff_E=363.04	-6.4	5.666	4.211
6q_620374_uff_E=372.95	-6.4	6.021	4.34
6q_620370_uff_E=467.26	-6.4	6.672	4.231
6q_620242_uff_E=487.43	-6.4	6.484	3.152
6q_617713_uff_E=360.61	-6.4	7.388	3.778
6q_617713_uff_E=360.61	-6.4	1.937	1.728
6q_617268_uff_E=361.47	-6.4	8.002	4.389
6q_611914_uff_E=389.12	-6.4	8.442	4.319
6q_586858_uff_E=517.53	-6.4	0	0
6q_574586_uff_E=496.46	-6.4	6.736	4.945
6q_574586_uff_E=496.46	-6.4	3.752	2.125
6q_57397526_uff_E=321.86	-6.4	6.406	3.998
6q_57397525_uff_E=364.21	-6.4	6.307	2.301
6q_5702061_uff_E=436.39	-6.4	0	0
6q_56950844_uff_E=501.37	-6.4	6.099	3.107
6q_56950843_uff_E=482.15	-6.4	8.49	6.115
6q_56950843_uff_E=482.15	-6.4	8.823	5.403
6q_56924745_uff_E=399.54	-6.4	6.909	4.276
6q_56691266_uff_E=482.23	-6.4	3.733	2.261
6q_566721_uff_E=474.85	-6.4	6.422	2.279
6q_51401507_uff_E=420.77	-6.4	0	0
6q_5126442_uff_E=412.73	-6.4	9.405	6.859
6q_5126442_uff_E=412.73	-6.4	0	0
6q_46844138_uff_E=498.83	-6.4	5.546	2.529
6q_46844138_uff_E=498.83	-6.4	0	0
6q_46844024_uff_E=467.06	-6.4	6.041	2.819
6q_46844023_uff_E=474.74	-6.4	8.26	4.893
6q_46844023_uff_E=474.74	-6.4	7.488	4.127
6q_46843962_uff_E=816.62	-6.4	8.422	4.627
6q_44566078_uff_E=549.87	-6.4	8.592	5.705
6q_44566068_uff_E=401.62	-6.4	7.251	4.046
6q_44566065_uff_E=441.34	-6.4	11.157	8.558
6q_44566064_uff_E=432.11	-6.4	6.729	4.964
6q_44566064_uff_E=432.11	-6.4	0	0
6q_44566051_uff_E=374.99	-6.4	6.588	4.701
6q_44565973_uff_E=439.63	-6.4	0	0
6q_44565921_uff_E=420.30	-6.4	6.634	4.456
6q_44148513_uff_E=442.54	-6.4	5.03	3.1
6q_44139468_uff_E=480.55	-6.4	7.08	4.956
[truncated: 1,926 more rows]
